## Low affinity integrin states have faster binding kinetics than the high affinity state

Running Title: **Ligand-interaction kinetics of integrin**

Jing Li<sup>1,2</sup>, Jiabin Yan<sup>1,2</sup> and Timothy A. Springer<sup>1,2\*</sup>

### Affiliations

<sup>1</sup>Program in Cellular and Molecular Medicine, Boston Children's Hospital

<sup>2</sup>Department of Biological Chemistry and Molecular Pharmacology and Department of Pediatrics, Harvard Medical School, Boston, MA 02115

\*Correspondence to: [springer@crystal.harvard.edu](mailto:springer@crystal.harvard.edu)

**Key words:** integrin  $\alpha 4\beta 1$ / integrin  $\alpha 5\beta 1$ / binding kinetics / cytoskeletal force

**Abstract.** Integrin conformational ensembles contain two low-affinity states, bent-closed and extended-closed, and an active, high-affinity, extended-open state. It is widely thought that integrins must be activated before they bind ligand; however, one model holds that activation follows ligand binding. As ligand-binding kinetics are not only rate limiting for cell adhesion but also have important implications for the mechanism of activation, we measure them here for integrins  $\alpha 4\beta 1$  and  $\alpha 5\beta 1$  and show that the low-affinity states bind substantially faster than the high-affinity state. On and off-rate measurements are similar for integrins on cell surfaces and ectodomain fragments. Although the extended-open conformation's on-rate is ~20-fold slower, its off-rate is ~25,000-fold slower, resulting in a large affinity increase. The tighter ligand-binding pocket in the open state may slow its on-rate. These kinetic measurements, together with previous equilibrium measurements of integrin conformational state affinity and relative free energy on intact cells, are key to a definitive understanding of the mechanism of integrin activation.

### INTRODUCTION

Integrins are a family of adhesion receptors that mechanically integrate the intracellular and extracellular environments and facilitate cell migration. Their  $\alpha$  and  $\beta$ -subunits associate noncovalently to form an extracellular ligand-binding head and then form multi-domain 'legs' that connect to single-pass transmembrane and cytoplasmic domains with binding sites for cytoskeletal adaptor or inhibitory proteins (Fig. 1A). Integrins populate a conformational ensemble with three overall conformational states: the low-affinity bent-closed (BC) and extended-closed (EC) conformations and the high-affinity extended-open (EO) conformation (Fig. 1A). The equilibrium between these conformational states is allosterically regulated by extracellular ligand binding, intracellular adaptor/inhibitor binding (Bouvard *et al*, 2013; Iwamoto & Calderwood, 2015) and tensile force applied by the actin cytoskeleton on the integrin  $\beta$ -subunit that is resisted by ligand embedded in the extracellular matrix or on cell surfaces (Kim *et al*, 2011; Legate & Fassler, 2009; Li & Springer, 2017; Nordenfelt *et al*, 2016; Park & Goda, 2016; Sun *et al*, 2016; Zhu *et al*, 2008) (Fig. 1A). The EO conformation has ~1000-fold higher binding affinity for ligand than the two closed conformations and is the final competent state to mediate cell adhesion and migration (Li & Springer, 2018; Li *et al*, 2017; Schürpf & Springer, 2011). Many previous studies have emphasized the importance of force in regulating integrin adhesiveness (Alon & Dustin, 2007; Astrof *et al*, 2006; Li & Springer, 2017; Nordenfelt *et al*, 2016; Nordenfelt *et al*, 2017; Sun *et al*, 2019; Zhu *et al*, 2008). Recent measurements of the intrinsic ligand-binding affinity of each conformational state and the equilibria linking them enabled a thermodynamic comparison of integrin activation models (Li & Springer, 2017, 2018; Li *et al*, 2017). Remarkably, only the combination of adaptor binding and cytoskeletal force can activate integrins in an ultra-sensitive manner, with the switch between on and off occurring over

a narrow range of signal input {Kuriyan, 2012 #24442}; the large increase in length between the bent and extended conformations (Fig. 1A) is indispensable for switch-like integrin activation.

Despite these advances, thermodynamics cannot describe the sequence of events in a multi-step transition; furthermore, energy-driven processes such as cytoskeleton movements occur under non-equilibrium conditions. Ligand-binding on- and off- rates are key parameters that determine whether integrin encounter of ligand is timely and whether the ligand remains bound for a sufficiently long time for the integrin to exert its function in the presence of force. Previous representative measurements (Dong *et al*, 2018; Kokkoli *et al*, 2004; Mould *et al*, 2014; Takagi *et al*, 2003) on integrin interaction with ligand have yielded kinetics on mixtures of conformational states, i.e., apparent on- and off-rates averaged over conformational states (Fig. 1B left). However, the ligand-binding kinetics of individual integrin conformational states remain unknown. These kinetics must be determined before we can understand how integrin function is regulated and how integrins work in concert with the cytoskeleton to provide traction for cell migration and firm adhesion for tissue integrity (Fig. 1B right).

Putting the question another way, what is the first step in inside-out integrin activation? In one view, talin binding inside the cell activates the integrin, presumably to the high affinity state, which then binds ligand. In another view, the first step is activation of the actin cytoskeleton, followed by binding of the integrin to ligand embedded in the extracellular environment and to talin incorporated in the actin cytoskeleton, which enables actin retrograde flow to elongate the lifetime of the high affinity integrin state.

For two classes of force-regulated adhesion molecules, each of which have a single low-affinity state and a single high-affinity state, selectins (Phan *et al*, 2006) and FimH (Yakovenko, 2015), the low-affinity conformation has a faster on-rate for ligand than the high-affinity conformation. If subsequent conformational change to the high affinity state is rapid, fast ligand binding kinetics to the low-affinity state efficiently couples ligand binding to stabilization by applied force of the high-affinity state, which has a long lifetime (Yakovenko, 2015). Work from our group on integrin  $\alpha V\beta 6$  showed that removal of the hybrid domain in the  $\alpha V\beta 6$  head resulted in a 50-fold increase in affinity for ligand yet decreased the apparent on-rate of ligand binding (Dong *et al.*, 2018) suggesting that the open conformation has a lower on-rate than the BC and EC states. However, the intrinsic ligand-binding kinetics for each state of integrin  $\alpha V\beta 6$  could not be determined due to the lack of tools to stabilize specific conformational states.

In this study, we utilized well-characterized conformation-specific Fabs (Li & Springer, 2018; Li *et al.*, 2017; Su *et al*, 2016) (Fig. 1C) to stabilize integrins  $\alpha 4\beta 1$  and  $\alpha 5\beta 1$  into defined ensembles containing only one or two of the three integrin conformational states and measured the ligand-binding kinetics of each defined ensemble. Together with previously determined intrinsic ligand-binding affinities and populations of conformational states (Li & Springer, 2018; Li *et al.*, 2017), our measurements enable us to define ligand-binding kinetics intrinsic to each conformational state. For each integrin, the two closed states have indistinguishable on- and off-rates for soluble peptide and macromolecular fragment ligands. Remarkably, the on-rate for ligand of the low-affinity closed integrin conformations is ~40-fold ( $\alpha 4\beta 1$ ) or ~5-fold ( $\alpha 5\beta 1$ ) higher than for the high-affinity EO conformation. The ~1,000-fold higher affinity of the EO conformation than the closed conformation is achieved by the ~25,000-fold lower off-rate of the EO conformation for both  $\alpha 4\beta 1$  and  $\alpha 5\beta 1$  integrins. These findings show for two representative  $\beta 1$  integrins that most ligand binding occurs to the bent-closed and/or extended-closed states, followed by conformational change to the extended-open state. The rapidity of ligand binding measured here, if coupled with similarly rapid binding of actin cytoskeleton adaptors to integrins and conformational change among integrin states, could enable coincidence of these binding events, together with tensile force transmission if the ligand is embedded in an extracellular environment, to regulate integrin activation.

## RESULTS

**Ligand-binding kinetics of intact  $\alpha 4\beta 1$  and  $\alpha 5\beta 1$  on cell surfaces.** We measured binding kinetics of intact  $\alpha 4\beta 1$  on Jurkat cells to two fluorescently labeled ligands, a phenylureide derivative of Leu-Asp-Val-Pro (FITC-LDVP) and a fragment of vascular cell adhesion molecule (VCAM) containing its first two domains (Alexa488-VCAM D1D2) (Fig. 2). Before adding ligands, cells were equilibrated with saturating concentrations of Fabs for 30 min at 22°C to stabilize specific conformational states (Li & Springer, 2018). Integrin extension, i.e. the EC and EO states, was stabilized with 4  $\mu$ M 9EG7 Fab, which binds to the  $\beta 1$ -subunit knee (Fig. 2B). The EO conformation was stabilized with a combination of 4  $\mu$ M 9EG7 Fab and 2  $\mu$ M HUTS4 Fab; the latter binds to the interface between the  $\beta 1$  and hybrid domains and stabilizes the EO conformation (Fig. 2C). Ligand binding kinetics was monitored as mean fluorescence intensity (MFI) by flow cytometry without washing (Fig. 2). Beginning at about 10 minutes, a 500-fold higher concentration of unlabeled ligand was added to measure the kinetics of dissociation. Background MFI at each fluorescent ligand concentration, measured under identical conditions except in presence of 10 mM EDTA (Fig. S1), showed no significant difference at different time points during the association and dissociation measurements and was averaged across different time points and subtracted to obtain specific binding.

Under basal conditions, with all three integrin states present in the ensemble, binding of FITC-LDVP to Jurkat cells reached equilibrium within 3 min (Fig. 2A). Upon addition of a 500-fold excess of LDVP, dissociation of FITC-LDVP was rapid and was 99.7% complete by 5 min (Fig. 2A). In contrast, both binding and dissociation of FITC-LDVP were slower when only the extended conformations (EC and EO) were present on Jurkat cells (Fig. 2B). Reaching steady state required ~5 min after addition of 20 nM FITC-LDVP, ~10 min with 10 nM ligand, and was not reached after 10 min with 5 nM ligand. After 10 min of dissociation, only 19.4% of ligand had dissociated (Fig. 2B). Association and dissociation were even slower when only the EO conformation was present (Fig. 2C). After 15 min of association, much less ligand had bound (Fig. 2C) than when both EC and EO conformations were present (Fig. 2B). Dissociation was also slower, with only 1.2% of bound ligand dissociating after 10 min (Fig. 2C).

VCAM D1D2 binds with ~100-fold lower affinity than LDVP to  $\alpha 4\beta 1$  (Li & Springer, 2018). As a result, binding to the basal ensemble was too low to measure over the noise from unbound ligand; however, we were able to measure binding kinetics to intact  $\alpha 4\beta 1$  stabilized in the extended (EC+EO) and EO states (Fig. 2D and E). When the two extended conformations (EC and EO) were present, binding of all three concentrations of Alexa488-VCAM D1D2 (10nM, 20nM and 30nM) reached equilibria within 2 min. Upon addition of a large excess of LDVP, dissociation of Alexa488-VCAM D1D2 was also fast; 100% dissociated by 5min (Fig. 2D). Association and dissociation both became markedly slower when only the EO conformation of  $\alpha 4\beta 1$  was present (Fig. 2E).

To address the generality of these results, we studied another integrin and cell type by measuring binding of a fluorescently-labeled two-domain fragment of fibronectin (Alexa488-Fn3<sub>9-10</sub>) to intact  $\alpha 5\beta 1$  integrin on K562 cells (Fig. 3). The BC conformation of  $\alpha 5\beta 1$  integrin on K562 cells is more stable than that of  $\alpha 4\beta 1$  integrin on Jurkat cells (Li & Springer, 2018). Therefore, to assure that the extended states (EC+EO) were saturably populated, they were stabilized with a combination of two Fabs, 6  $\mu$ M 9EG7 Fab and 2  $\mu$ M SNAKA51 Fab (Fig. 3A left). The EO state of  $\alpha 5\beta 1$  (Fig. 3B left) was stabilized with the same combination of Fabs as used for  $\alpha 4\beta 1$ . Although binding affinity was too low to measure kinetics of the basal ensemble (Li *et al.*, 2017), we were able to measure Alexa488-Fn3<sub>9-10</sub> kinetics with the EC+EO and EO ensembles of intact  $\alpha 5\beta 1$  (Fig. 3). When  $\alpha 5\beta 1$  was stabilized in the EO conformation, Alexa488-Fn3<sub>9-10</sub> bound and dissociated significantly more slowly than when both the EC and EO states of  $\alpha 5\beta 1$  were present in the ensemble (Fig. 3A and B). Faster binding and dissociation of Alexa488-Fn3<sub>9-10</sub> from the EC+EO ensemble than EO showed that the EC state of  $\alpha 5\beta 1$  binds and dissociates faster than the EO state, just as found for  $\alpha 4\beta 1$ .

To quantify the binding kinetics of intact  $\alpha 4\beta 1$  and  $\alpha 5\beta 1$  under each condition, we globally fit the traces of specific binding in both association and dissociation phases at each

concentration of fluorescently labeled ligand to the 1 vs. 1 Langmuir binding model to determine the apparent on- and off-rates,  $k_{\text{on}}^{\text{app}}$  and  $k_{\text{off}}^{\text{app}}$  (Fig. 2F and Fig. 3C). The ratio of the apparent off- and on- rates,  $k_{\text{off}}^{\text{app}}/k_{\text{on}}^{\text{app}}$ , agrees reasonably well with the equilibrium dissociation constant,  $K_d$ , previously determined by saturation binding (Figs. 2F and 3C) (Li & Springer, 2018; Li *et al.*, 2017). These agreements suggest that the 1 vs. 1 Langmuir binding model can reasonably fit the kinetic data. Overall, these results show that ligand binds to and dissociates from the EO conformation more slowly than from the BC and EC conformations. The kinetics measured here for the basal and EC+EO ensembles are apparent, because they include contributions from distinct conformational states present in these ensembles. In contrast, EO state kinetics are measured exactly because EO is the only state present in the EO ensemble. In the final section of Results, we will use previous measurements of the populations of the states in each ensemble to calculate the on- and off-rates for conformations within mixtures of states.

**Binding kinetics of soluble  $\alpha 5\beta 1$  ectodomain for Fn3<sub>9-10</sub>.** We utilized bio-layer interferometry (BLI) (Wallner *et al.*, 2013) to measure the kinetics of binding of an ectodomain fragment of  $\alpha 5\beta 1$  to the biotin-labeled Fn3<sub>9-10</sub> fragment of fibronectin immobilized on streptavidin biosensors (Fig. 4). The ectodomain was truncated just prior to the transmembrane domains of the  $\alpha 5$  and  $\beta 1$  subunits and was expressed in a cell line containing a glycan processing mutation so that it had high-mannose rather than complex-type N-glycans. Truncation of  $\alpha 5\beta 1$  and high mannose glycoforms raise the free energy of the BC conformation relative to the EO conformation, so that the population of the EO state in the basal ensemble increased from 0.11% in intact  $\alpha 5\beta 1$  to 4.6% in the high-mannose ectodomain fragment (Li *et al.*, 2017). The practical consequence of the increase in population of the EO state in the  $\alpha 5\beta 1$  ectodomain basal ensemble was that it raised basal ectodomain ensemble affinity and, in contrast to intact  $\alpha 5\beta 1$  on K562 cells, enabled us to measure basal ensemble Fn3<sub>9-10</sub> binding kinetics (Fig. 4A).

Binding kinetics were measured by transferring Fn3<sub>9-10</sub> biosensors to wells containing the  $\alpha 5\beta 1$  ectodomain in the absence or presence of conformation-stabilizing Fabs. Dissociation kinetics were measured by transfer of sensors to wells lacking the integrin but containing identical Fab concentrations (Fig. 4 A-D cartoons). Equilibrium  $K_d$  values were previously shown to be independent of the Fab used to stabilize a particular state (Li *et al.*, 2017). However, we were concerned that binding of Fabs, particularly those that bind close to ligand binding sites, might slow kinetics and therefore tested this by varying the Fabs used to stabilize the EO state.

The kinetic curves showed that the  $\alpha 5\beta 1$  ectodomain EO state associated more slowly than the mixtures with the closed states and also dissociated more slowly (Fig. 4A-D) as confirmed in the tabulated results (Fig. 4F). Overall, these differences among ensembles resembled those found for the EC+EO ensemble and EO state of intact  $\alpha 5\beta 1$  on K562 cells and extended measurements to the basal  $\alpha 5\beta 1$  ensemble. The on and off-rates of the EO state for Fn3<sub>9-10</sub> determined in the presence of 12G10 Fab were 4-fold and 2-fold lower, respectively, than those determined in the presence of 9EG7&HUTS4 Fabs (Fig. 4C, 4D and 4F). As 12G10 Fab binds close to the ligand-binding site in the  $\beta 1$  domain (Fig. 1A), we use  $k_{\text{off}}^{\text{app}}$  and  $k_{\text{on}}^{\text{app}}$  kinetics determined with the 9EG7, 8E3, SNAKA51 & HUTS4 Fabs, which bind far from the ligand-binding site, for calculating true ( $k_{\text{off}}$  and  $k_{\text{on}}$ ) kinetic rates for each state in the final section of Results.

**The off-rate of the closed states.** Due to the low affinities of the closed states there was too little binding to directly measure  $k_{\text{on}}$  or  $k_{\text{off}}$  in presence of saturating closure-stabilizing Fabs. We therefore used another approach. We first allowed ligand binding to integrins to reach steady state in the absence of a closure-stabilizing Fab. We then added different concentrations of closure-stabilizing Fab mAb13 and measured dissociation kinetics (Figs. 5-6). Dissociation of the ligand from the EO state is very slow as shown above and is negligible in our experimental time scale. At high Fab mAb13 concentrations, when the EO ligand-bound state (EO•L) converts to either BC•L or EC•L (they are grouped together here as (C•L), mAb13 Fab binds and prevents back-conversion to EO•L (Fig. 5A, B). After saturating concentrations of Fab mAb13 are added to basal or EO+EC ensembles pre-equilibrated with ligand, the effective off-

rate is contributed by two steps, the conformational change from EO•L to C•L and the dissociation of ligand from mAb13-bound C•L (mAb13•C•L) (Fig.5A, B). Thus, the observed off-rate at saturating concentration of mAb13 Fab is contributed by the rates of both steps and permits the determination of the lower limit of  $k_{\text{off}}^{\text{C}}$ .

We measured FITC-LDVP dissociation from basal or extended ensembles of  $\alpha_4\beta_1$  on Jurkat cells after addition of a range of mAb13 Fab concentrations (Fig. 5A-B). Saturable binding of mAb13 Fab to nascent cell surface C•L was evident from the approach to a plateau of  $k_{\text{off}}^{\text{max}}$  (Fig. 5A-C). The  $k_{\text{off}}^{\text{max}}$  values measured for LDVP dissociation from basal and extended  $\alpha_4\beta_1$  ensembles on Jurkat cells were similar and within error of one another, with an average of  $\sim 120 \cdot 10^{-3}$  /s (Fig. 5C).

Similarly, we measured Fn<sub>39-10</sub> dissociation from basal or extended ensembles of the  $\alpha_5\beta_1$  ectodomain (Fig. 6). The effect of mAb13 Fab on increasing  $k_{\text{off}}$  was saturable, as shown by approach to a plateau (Fig.6A-C). The fit to a saturation dose response curve yielded  $k_{\text{off}}^{\text{max}}$  values for the basal and extended ensembles of  $(1600 \pm 100) \cdot 10^{-3}$  /s and  $(1900 \pm 100) \cdot 10^{-3}$ /s, respectively (Fig. 6C).

**Calculation of ligand-binding kinetics from ensemble measurements.** We directly measured the ligand-binding and dissociation kinetics for the EO state of  $\alpha_4\beta_1$  and  $\alpha_5\beta_1$  (Fig. 2C, E, Fig. 3B, Fig. 4C). In contrast, kinetics for the BC and EC states were only measured within ensembles. Their kinetics are convoluted in two respects. First, measurements on ensembles contain kinetics contributed by all states within the ensemble. Second, apparent association and dissociation kinetics may each contain a contribution from the kinetics of conformational change (Fig. 1B). Fig. 1B left shows apparent on- and off-rates and Fig. 1B right shows all the actual pathways by which ligand binding and dissociation can occur, which include all known integrin conformational states and the kinetics of conformational change between them. Furthermore, after ligand binding to the closed states, rapid conformational change to the EO state occurs and is responsible for our ability to measure the kinetics of binding as a result of accumulation of ligand-bound integrin in the EO state.

The underlying assumption for deconvoluting the kinetics of the closed states is that if integrin conformational transition kinetics are sufficiently fast so that the populations of the three integrin states do not deviate significantly during our experiments from the equilibrium values of the populations, then measured kinetics will not be significantly limited by conformational transition kinetics. In this case, both free integrins and ligand-bound integrins can be considered as readily equilibrated among their conformational states, and ligand binding coupled with integrin conformational changes can be approximated by the apparent 1 vs. 1 reaction between integrin and ligand (this allows the double tildes in Eqs. 1-4 in Fig. 7A to be treated as equal signs). All on- and off- rates measured here were well fit with the 1 vs. 1 Langmuir binding model (Fig. 2A-E, Fig. 3A-B, Fig. 4A-D, Fig 5B-C, and Fig. 6A-B), supporting this assumption. Moreover, reasonable agreement between the ratios of the apparent off- and on- rates,  $k_{\text{off}}^{\text{app}}/k_{\text{on}}^{\text{app}}$ , and previously determined equilibrium dissociation constants,  $K_d$ , (Figs. 2F, 3C and 4F), validates the assumption that the apparent on- and off- rates ( $k_{\text{on}}^{\text{app}}$  and  $k_{\text{off}}^{\text{app}}$ ) for each defined ensemble can be approximated by the on- and off- rates of each state weighted by its population in the ensemble (Fig. 7A, Eqs. 1-4). The population of the integrin states in absence of ligand (BC, EC, and EO) and in presence of saturating concentrations of ligand (BC•L, EC•L, and EO•L) were calculated based on the previously determined population and ligand-binding affinity of each state (Fig. S3B, Eqs. S5-S10) in the respective integrin  $\alpha_4\beta_1$  and  $\alpha_5\beta_1$  preparations (Li & Springer, 2018; Li *et al.*, 2017) and are shown in Fig. 7B.

On- and off- rates for each  $\alpha_4\beta_1$  and  $\alpha_5\beta_1$  integrin state on intact cells and for the purified  $\alpha_5\beta_1$  ectodomain are summarized in Fig. 7C. Values are best determined, i.e. with the lowest errors, for the on-rate of EO state. Errors were higher for the BC and EC states, particularly for  $k_{\text{off}}$ . Therefore,  $k_{\text{off}}$  values for each state were also calculated from  $k_{\text{off}} = K_d \cdot k_{\text{on}}$ , where  $K_d$  is from equilibrium measurements (Li & Springer, 2018; Li *et al.*, 2017). The  $k_{\text{off}}$  values of each state determined from these two strategies agree well with one another for each integrin-ligand pair.

In addition,  $k_{\text{off}}$  values were also comparable to the lower limit of  $k_{\text{off}}^{\text{C}}$  and  $k_{\text{off}}^{\text{EC}}$  approached by measuring dissociation in presence of a closure-stabilizing Fab (Fig. 5 and Fig. 6).

## DISCUSSION

**Intrinsic ligand-binding kinetics of integrin conformational states.** Employing conformation-specific Fabs against the integrin  $\beta 1$  subunit to stabilize integrin  $\alpha 4\beta 1$  and  $\alpha 5\beta 1$  into defined ensembles, we determined the on- and off-rates of each integrin conformational state. We found that despite  $\sim 1,000$  lower affinity, the closed states, BC and EC, of two  $\beta 1$  distinct integrins have markedly higher on-rates than the EO state. These findings have important implications for the sequence of events that occur when integrins interact with ligands, as discussed in the Integrin Activation section below. Previously, we determined equilibrium  $K_d$  values for the three different conformational states of integrins  $\alpha 4\beta 1$  and  $\alpha 5\beta 1$  (Li & Springer, 2018; Li *et al.*, 2017). We used integrins on intact cells and as different types of ectodomain fragments. These different preparations differed up to 320-fold in affinity of their basal ensembles. However, integrin affinity for ligand was essentially identical for each integrin state and all differences in ensemble affinity were ascribable to variation among the preparations in the relative free energies of the three states. Therefore, we concluded that integrin affinity was intrinsic to each state (Li & Springer, 2018; Li *et al.*, 2017). There may be real differences between cell surface and soluble integrins imposed by orientation, cell surface charge, and the glycocalyx; nonetheless, our previous measurements of  $K_d$  values for the EC and EO states of  $\alpha 5\beta 1$  on the cell surface and as an ectodomain fragment are within 2-fold of one another (Li & Springer, 2018; Li *et al.*, 2017). These results are consistent with the intrinsic affinity concept, i.e. that integrin conformational state is the primary determinant of affinity, even though the geometry of integrins on cell surfaces may cause some modifications to these values that are minor compared to the large differences between the closed and open states.

Similar to intrinsic affinities, the results here on ligand-binding kinetics were consistent with on-rates and off-rates that are intrinsic to integrin conformational states. On-rates for intact  $\alpha 5\beta 1$  on cell surfaces and the  $\alpha 5\beta 1$  ectodomain in the EO state for the same fibronectin fragment were identical, and off-rates differed by only 1.8-fold. Similarly, on- and off-rates for the EC state of the intact cell-surface and ectodomain forms of  $\alpha 5\beta 1$  differed only by 1.1-fold and 1.9-fold respectively. We were able to measure on- and off-rates for the BC state of intact  $\alpha 4\beta 1$  binding to LDVP and for the BC state of the  $\alpha 5\beta 1$  ectodomain binding to Fn3<sub>9-10</sub>. In each case, the values of the BC state were within error of those for the EC state. The similar ligand-binding kinetics of the BC and EC states are in agreement with the essentially identical intrinsic affinities of the two closed states (Li & Springer, 2018; Li *et al.*, 2017). In further agreement, crystal structures of the integrin  $\alpha \text{IIb}\beta 3$  ectodomain in the BC state and of the  $\alpha \text{IIb}\beta 3$  closed headpiece fragment, which has no interactions with the lower legs and thus serves as a model for the EC conformation (Zhu *et al.*, 2008; Zhu *et al.*, 2013), show essentially identical conformations of the ligand binding site.

We checked whether kinetics might be influenced by bound Fabs. In our previous work, we compared affinities measured with at least two Fabs specific for the closed, open, and extended states and for each state compared Fabs that bound to different domains. The results showed no significant differences between affinities measured with different Fabs. Here, we compared two Fabs used to stabilize the EO state and found slower association and dissociation kinetics with 12G10, which binds near the ligand binding site in the  $\beta 1$  domain than HUTS4, which binds distally in the hybrid domain (Fig. 4F). As Fabs generally decrease dynamic protein motions in their epitopes (Wei *et al.*, 2014) and may also sterically slow binding, the kinetics measured using HUTS4 Fab more likely approximate integrin kinetics in the absence of Fab and are reported in Fig. 7C.

The kinetics of the EC and BC states were calculated from measurements on extended or basal ensembles after correction for the kinetics in these ensembles contributed by the EO state. As a check on these measurements, we also measured  $k_{\text{off}}$  in the presence of mAb13 Fab, which after conformational conversion of EO•L to EC•L+BC•L trapped the closed states so

that their dissociation could be measured. The lower limit of  $k_{\text{off}}^{\text{C}}$  and  $k_{\text{off}}^{\text{EC}}$  determined from these experiments (Fig. 5C and 6C) are in good agreement with the calculated off-rate of the closed states (Fig. 7C).

Typical protein-protein on-rates as found for antibody-antigen interactions are in the range of  $10^5$  to  $10^6$   $\text{M}^{-1} \text{s}^{-1}$  (Alsallaq & Zhou, 2008). The on-rates for the BC and EC states were in this range, e.g.  $3.5 \times 10^5$  and  $1.5 \times 10^6$   $\text{M}^{-1} \text{s}^{-1}$  for  $\alpha 5\beta 1$  binding to  $\text{Fn}3_{9-10}$  and  $\alpha 4\beta 1$  binding to VCAM, respectively. In contrast, the on-rates for EO states for the corresponding integrin-ligand pairs were  $7.5 \times 10^4$  and  $3.4 \times 10^4$   $\text{M}^{-1} \text{s}^{-1}$ , respectively. These rates suggest a hindrance to ligand binding. Ligand-bound crystal structures in both open and closed conformations are known for two RGD-binding integrins,  $\alpha \text{IIb}\beta 3$  (Xiao *et al.*, 2004; Zhu *et al.*, 2013) and  $\alpha \text{V}\beta 6$  (Dong *et al.*, 2014; Dong *et al.*, 2017). Additionally, high resolution structures show RGD peptides bound to both closed and intermediate (partially open) conformations of  $\alpha 5\beta 1$  (Nagae *et al.*, 2012; Xia & Springer, 2014). The open conformation has a tighter ligand-binding pocket. Slower ligand-binding kinetics for the open conformation is consistent with its tighter ligand-binding pocket, especially around the key RGD Asp residue (Fig. 7D). Movement of the  $\beta 1$ - $\alpha 1$  loop toward the ligand and the MIDAS  $\text{Mg}^{2+}$  ion upon  $\beta \text{I}$  domain opening partially buries the  $\text{Mg}^{2+}$  ion and is expected to slow binding of the Asp sidechain, which must fit into a tight pocket with a specific geometry dictated by partially covalent and highly directional Asp sidechain metal coordination and hydrogen bonds to the  $\beta 1$ - $\alpha 1$  loop backbone amide nitrogens.

The  $\sim 1,000$ -fold higher affinities of the EO than the closed conformations for both  $\alpha 4\beta 1$  and  $\alpha 5\beta 1$  integrins are achieved by the  $\sim 25,000$ -fold slower off-rate of the EO conformation (Fig. 7C). Similar to the differences in on-rates, the differences in off-rates can be understood in terms of the structural details in the ligand-binding pocket and the much higher affinity of the EO state. The tighter Asp sidechain binding pocket and greater burial of the Asp provide a barrier to dissociation (Fig. 7D). The number of hydrogen bonds of the Asp sidechain to the  $\beta 1$ - $\alpha 1$  loop backbone increases in the open state (Zhu *et al.*, 2013). Furthermore, the greater burial of these polar bonds and increased network of hydrogen bonds around them increases their strength. The Arg sidechain also strengthens its hydrogen bonding in the open state. During opening, as the  $\beta \text{I}$  domain  $\beta 1$ - $\alpha 1$  loop moves toward the Asp, the entire RGD moiety slides toward the  $\alpha$ -subunit, which is to the left in the view of Fig. 7D. This movement is seen in Fig. 7D as the closer approach of the Asp to the  $\alpha 2$ - $\alpha 3$  loop in the open state. A hydrogen bond network with two waters between the RGD Arg sidechain and  $\alpha 5\beta 1$  residue Gln-221 in the closed state is exchanged for a direct Arg hydrogen bond to  $\alpha 5\beta 1$  Gln-221 as RGD slides toward  $\alpha 5\beta 1$  during opening (Xia & Springer, 2014). All these can contribute to the higher affinity and tens of thousands-fold slower off-rate of the EO conformation than the closed conformations.

Our kinetic measurements were carried out at  $22^\circ\text{C}$ . At  $37^\circ\text{C}$ , both on- and off-rates will be higher. Increase in temperature generally has a much greater effect on dissociation rates than association rates (Johnstone *et al.*, 1990). The amount of increase depends on the activation energy; i.e. the height of the energy barrier to dissociation.

The intrinsic ligand-binding kinetics of integrin conformational states described here are consistent with previous kinetic observations. These studies showed that activating integrin ensembles with  $\text{Mn}^{2+}$  or activating IgG or Fab, using conditions that in retrospect would partially, but not completely, shift integrin ensembles to the EO state, decreased the ligand off-rates of integrins  $\alpha 4\beta 1$  and  $\alpha 5\beta 1$  (Chigaev *et al.*, 2001; Takagi *et al.*, 2003). The extremely long lifetime of the  $\alpha 5\beta 1$  complex with fibronectin in the EO state, around several hours, explains why the  $\alpha 5\beta 1$  complex with fibronectin in  $\text{Mn}^{2+}$  was much more rapidly reversed by mAb 13 IgG specific for the closed conformations than by competitive inhibitor (Mould *et al.*, 2016; Mould *et al.*, 2014).

**Integrin activation.** A major impetus for these studies was to determine the pathway for activation of integrins in cells, i.e. the activation trajectory. Of key importance is how integrins on the cell surface first engage ligands. By dynamically linking the actin cytoskeleton to the extracellular environment, integrins transduce both external and internal mechanochemical cues and bi-directionally signal across the plasma membrane. Integrin signaling is governed by

cytoskeletal force and the force stabilized, high-affinity, extended-open conformation is the only state competent to mediate cell adhesion (Alon & Dustin, 2007; Astrof *et al.*, 2006; Li & Springer, 2018; Li *et al.*, 2017; Nordenfelt *et al.*, 2016; Nordenfelt *et al.*, 2017; Sun *et al.*, 2019; Zhu *et al.*, 2008). Mechanotransduction occurs when integrins bind to ligand anchored in the extracellular environment, the cytoplasmic domain simultaneously binds to a cytoskeletal adaptor and links to actin retrograde flow, and a tensile force is transmitted through the integrin that stabilizes the extended-open conformation over the bent-closed conformation. Thus the on- and off- rates of ligand binding to integrins are among the key parameters that determine the cytoskeletal force regulation efficiency. We found that the closed states, with loose ligand binding pockets, have higher on-rates for ligand binding, making them the most efficient state for encountering ligand.

Because the BC state is >200-fold more populated than the EC state for both integrins  $\alpha 4\beta 1$  and  $\alpha 5\beta 1$  on the cell surface (Li & Springer, 2018; Li *et al.*, 2017) (Fig. 7B), the BC state may have an important role in initial binding to ligand. There are few constraints on the orientation of integrins on cell surfaces until transmitted force orients them when they bridge extracellular ligands and the actin cytoskeleton (Nordenfelt *et al.*, 2017; Swaminathan *et al.*, 2017). In the absence of such engagement, linkers of largely disordered residues between the last module of integrin  $\alpha$ - and  $\beta$ -subunit ectodomains and the beginning of their transmembrane  $\alpha$ -helices allows large tilting motions of the ectodomain relative to the plasma membrane (Zhu *et al.*, 2009). Thus, the common depiction of the leg domains of integrins and other receptors as oriented normal to the cell membrane (Fig. 1A) is only a conventional cartoon representation and has no experimental basis. Structures of integrin  $\alpha 11\beta 3$  linker and transmembrane domains on cell surfaces, combined with the ectodomain, showed that large movements of the BC state relative to the membrane normal were possible. Nonetheless, none of these orientations have a ligand binding site with an orientation optimal for binding a ligand on the surface of another cell or in the extracellular matrix. In contrast, the ligand binding site is better exposed in the EC state (Fig. 1A) and the EC state also can bend at multiple domain-domain junctions and is less constrained in orientation relative to the plasma membrane. It is possible that either the BC state is the predominant ligand-binding state, or that the BC state provides a large reserve of integrins that, through conformational sampling of the EC state, allows the EC state to be the predominant ligand-binding state.

Once ligand is bound to the BC or EC state, the ~1000-fold higher ligand-binding affinity for the EO conformation strongly favors conformational change to the EO state (Li & Springer, 2018; Li *et al.*, 2017). If an adaptor and the actin cytoskeleton are bound at the time when a ligand that is embedded in the extracellular environment is bound to the integrin, the ligand resists the force from actin retrograde flow, and tensile force is transmitted through the integrin, strongly stabilizing the EC•L and EO•L conformations (Li & Springer, 2017). Furthermore, the EO•L state is ~2,000 and ~10,000 more populated than the EC•L state for integrins  $\alpha 4\beta 1$  and  $\alpha 5\beta 1$ , respectively (Fig. 7B). The off-rates of the EO states of  $\alpha 4\beta 1$  and  $\alpha 5\beta 1$  equate to lifetimes of about 0.4 hours and 3 hours, respectively, and serve to make integrin-ligand bonds highly resistant to detachment. In contrast, when engagement to the adaptor/actin cytoskeleton is reversed, BC•L would become substantially populated in the basal ligand-bound conformations (Fig. 7B), and with a lifetime in millisecond to second range, would allow the integrin to dissociate from ligand.

In summary, we have substantially advanced our understanding of how integrins on intact cells bind ligands by measuring the ligand binding and dissociation kinetics for the three conformational states of two integrins,  $\alpha 4\beta 1$  and  $\alpha 5\beta 1$ . While it may seem surprising that the low affinity states bind more rapidly than the high affinity states, our findings concord with previous studies on selectins (Phan *et al.*, 2006) and bacterial fimbriae adhesins (Yakovenko, 2015) that have two states, one flexed (bent) and the other extended, that are also subjected to regulation by force, in which the extended state is the higher affinity state. As there is no structural homology between the three classes of adhesins, convergent evolution appears to have selected a low affinity, flexed/bent state for rapid ligand binding that can be subsequently



stabilized by force to a high affinity, extended state that can then better resist the tendency of force to accelerate receptor-ligand dissociation. In the two-state systems, force is applied externally by shear flow, while in the three-state integrin system, force is applied internally by engagement of actin retrograde flow. This empowers the actin cytoskeleton machinery to regulate integrin function, ensuring intimate coordination between the needs of adhering and migrating cells because the same signaling pathways that regulate actin polymerization and disassembly also regulate formation of cellular attachments through integrins to the extracellular environment. While the kinetics of integrin conformational change remain to be measured, the excellent fit of kinetic measurements to the 1 vs. 1 Langmuir model found here and agreement between  $k_{\text{off}}/k_{\text{on}}$  values and  $K_d$  measured at equilibrium suggest that integrin conformational change kinetics are also rapid. Rapid ligand binding, together with rapid cytoskeletal adaptor binding, would enable their coincidence to regulate integrin activation, thus providing a seamless method for activating integrins at cellular locations where actin is activated and at extracellular locations where ligand is available.

## MATERIALS AND METHODS

**Fabs.** IgGs, 8E3 (Mould *et al*, 2005), 9EG7 (Bazzoni *et al*, 1995), 12G10 (Mould *et al*, 1995), HUTS4 (Luque *et al*, 1996), mAb13 (Akiyama *et al*, 1989) and SNAKA51 (Clark *et al*, 2005) were produced from hybridomas and purified by protein G affinity; Fabs were prepared with papain digestion in PBS (phosphate-buffered saline with 137 mM NaCl, 2.7 mM KCl, 10 mM Na<sub>2</sub>HPO<sub>4</sub> and 1.8 mM KH<sub>2</sub>PO<sub>4</sub>, pH7.4) with 10 mM EDTA and 10 mM cysteine and papain: IgG mass ratio of 1:500 for 8 hrs at 37°C, followed by Hi-Trap Q chromatography in Tris-HCl pH 9 with a gradient in the same buffer to 0.5 M NaCl.

**Integrin  $\alpha 5\beta 1$  soluble preparations.** Integrin  $\alpha 5\beta 1$  ectodomain ( $\alpha 5$  F1 to Y954 and  $\beta 1$  Q1 to D708) with secretion peptide, purification tags, and C-terminal clasp (Takagi *et al*, 2001) were produced by co-transfecting the pcDNA3.1/Hygro(-) vector coding the  $\alpha$ -subunit and pIRES vector coding the  $\beta$ -subunit into HEK 293S GnTI<sup>-/-</sup> (N-acetylglucosaminyl transferase I deficient) cells. Stable transfectants were selected with hygromycin (100  $\mu$ g/ml) and G418 (1 mg/ml), and proteins were purified from culture supernatants by His tag affinity chromatography and Superdex S200 gel filtration after cleavage of C-terminal clasp and purification tags with Tev protease (Li *et al*, 2017).

**Peptidomimetic and macromolecule fragments.** FITC-conjugated  $\alpha 4\beta 1$  specific probe, 4-((N'-2-methylphenyl)ureido)-phenylacetyl-L-leucyl-L-aspartyl-L-valyl-L-prolyl-L-alanyl-L-alanyl-L-lysine (FITC-LDVP) and its unlabeled version, LDVP, were from Tocris Bioscience (Avonmouth, Bristol, United Kingdom). Human VCAM D1D2 (mature residues F1 to T202) were expressed and purified from HEK 293S GnTI<sup>-/-</sup> cell line supernatants by affinity chromatography and gel filtration (Yu *et al*, 2013). VCAM D1D2 was fluorescently labeled with Alexa Fluor 488 NHS Ester (ThermoFisher Scientific). Human Fn3<sub>9-10</sub> S1417C mutant (mature residues G1326 to T1509) and its synergy and RGD sites (R1374A&P1376A&R1379A&S1417C& $\Delta$ 1493-1496) mutated inactive version were expressed in *E. coli* and purified as described (Li *et al*, 2017; Takagi *et al*, 2001). Fn3<sub>9-10</sub> S1417C mutant was fluorescently labeled with Alexa Fluor 488 C5 maleimide (ThermoFisher Scientific) at residue Cys-1417. Both Fn3<sub>9-10</sub> S1417C mutant and its inactive version were biotinylated with Maleimide-PEG11-Biotin at residue 1417 (ThermoFisher Scientific) in PBS.

**Quantitative fluorescent flow cytometry.** Jurkat and K562 cells (10<sup>6</sup> cells/mL in RPMI-1640 medium, 10% FBS) were washed twice with assay medium (Leibovitz's L-15 medium, 10 mg/mL BSA) containing 5 mM EDTA, twice with assay medium alone, and suspended in assay medium. Cells at 2x10<sup>6</sup> cells/mL were incubated with indicated concentration of Fabs for 30min at 22°C. Addition of FITC-LDVP, Alexa488- VCAM D1D2 (1.6 labeling ratio) or Alexa488-Fn3<sub>9-10</sub> (1.0 labeling ratio) at indicated concentrations initiated association. Association was measured

as mean fluorescence intensity (MFI) at successive time points after addition of the fluorescent ligands. Addition of 500-fold higher concentration of the unlabeled ligand at the end of the association phase initiated the dissociation phase. Background MFI for FITC-LDVP, Alexa488-VCAM D1D2 and Alexa488-Fn3<sub>9-10</sub> in presence of 10 mM EDTA was subtracted (Supplemental Fig. S1).

**Fitting flow cytometry and BLI kinetic binding traces with 1 vs. 1 Langmuir binding model** Kinetic traces including both the association phase and the dissociation phase at different analyte concentrations were globally fitted to the following function.

$$R_t = \left( \frac{1}{2} + \frac{(t_D - t)}{2|t_D - t|} \right) \frac{R_{\max} k_{\text{on}} [A]}{k_{\text{off}} + k_{\text{on}} [A]} \left( 1 - e^{-(k_{\text{off}} + k_{\text{on}} [A]) t} \right) + \left( \frac{1}{2} - \frac{(t_D - t)}{2|t_D - t|} \right) \frac{R_{\max} k_{\text{on}} [A]}{k_{\text{off}} + k_{\text{on}} [A]} \left( 1 - e^{-(k_{\text{off}} + k_{\text{on}} [A]) t_D} \right) e^{-k_{\text{off}} (t - t_D)},$$

where  $t$  is time,  $R_t$  is response at time  $t$ ,  $t_D$  is the time that dissociation starts,  $[A]$  is the analyte concentration, and  $R_{\max}$  is the maximum response. The first term fits the data in the association phase and the second term fits the data in the dissociation phase. The prefactor of the first term is 1 prior to  $t_D$  and becomes 0 after  $t_D$ ; whereas the prefactor for the second term is 0 prior to  $t_D$  and becomes 1 after  $t_D$ . Nonlinear least square fit of  $R_t$ ,  $[A]$ , and  $t$  to the above equation yields the on-rate,  $k_{\text{on}}$ , off-rate,  $k_{\text{off}}$ , and  $R_{\max}$ .

**Bio-Layer Interferometry (BLI).** Binding kinetics of unclashed high-mannose  $\alpha 5\beta 1$  ectodomain and Fn3<sub>9-10</sub> was measured by BLI (Wallner *et al.*, 2013) with streptavidin biosensors on an Octet RED384 System. The reaction was measured on 96 well plate (200  $\mu\text{L}$ /well) in buffer with 20 mM Tris HCl (pH 7.4), 150mM NaCl, 1mM Ca<sup>2+</sup>, 1mM Mg<sup>2+</sup> and 0.02% Tween20. Streptavidin biosensors were hydrated in reaction buffer for 10 min before starting the measurements. Each biosensor was sequentially moved through 5 wells with different components: (1) buffer for 3 minutes in baseline equilibration step; (2) 35 nM biotin-Fn3<sub>9-10</sub> for 1 minute for immobilization of ligand onto the biosensor; (3) indicated concentrations of Fabs for 5 minutes for another baseline equilibration; (4) indicated concentrations of  $\alpha 5\beta 1$  ectodomain and Fabs for the association phase measurement; (5) indicated concentrations of Fabs for the dissociation phase measurement. Each biosensor has a corresponding reference sensor that went through the same 5 steps, except in step 2 the ligand was replaced with 35 nM inactive version of Fn3<sub>9-10</sub> with both the RGD binding site and the synergy site (PHSRN) mutated. Background subtracted response in both the association and dissociation phases, and at different  $\alpha 5\beta 1$  ectodomain concentrations, were globally fit to the 1 vs. 1 Langmuir binding model, with  $k_{\text{on}}^{\text{app}}$  and  $k_{\text{off}}^{\text{app}}$  as shared fitting parameters and maximum response ( $R_{\max}$ ) for each biosensor as individual fitting parameter. The equilibrium binding (response) was calculated from  $k_{\text{on}}^{\text{app}}$  and  $k_{\text{off}}^{\text{app}}$  values at each  $\alpha 5\beta 1$  ectodomain concentration and fit to a dose response curve to calculate  $K_d$  values as a check on  $k_{\text{off}}^{\text{app}}/k_{\text{on}}^{\text{app}}$  values. To calculate equilibrium response ( $R_{\text{eq}}$ ), fitted  $k_{\text{on}}$ ,  $k_{\text{off}}$ , and  $R_{\max}$  values at each  $\alpha 5\beta 1$  ectodomain concentration  $[A]$  were used to calculate  $R_{\text{eq}}$  at a time 1,000-fold longer than the "binding time", i.e.,  $t =$

$1000 \cdot \frac{1}{K_{\text{on}} [A]}$ , with the following equation:

$$R_{\text{eq}} = \frac{R_{\max} k_{\text{on}} [A]}{k_{\text{off}} + k_{\text{on}} [A]} \left( 1 - e^{-(k_{\text{off}} + k_{\text{on}} [A]) t} \right)$$

### Calculating ligand-binding and dissociation rates for the BC and EC states

The measured on- and off- rates ( $k_{\text{on}}^{\text{app}}$  and  $k_{\text{off}}^{\text{app}}$ ) for each defined ensemble containing 2 or 3 states shown in Figs. 2-4 was approximated by the on- and off- rates of each state weighted by its population in the ensemble (Fig. 7A, Eqs. 1-4). At steady state, the population of the free integrin states and the ligand-bound integrin states were calculated based on the previously determined population and intrinsic ligand-binding affinity of each state (Fig. S3B, Eqs. S5-S10)

in the respective integrin  $\alpha 4\beta 1$  and  $\alpha 5\beta 1$  preparations (Li & Springer, 2018; Li *et al.*, 2017) (Fig. 7B). Specifically,  $\frac{k_a^{EO}}{k_a^{EC}}$  and  $\frac{k_a^{EO}}{k_a^{BC}}$  (in Fig.S3B, Eqs.S8-S10), are the intrinsic ligand-binding affinity ratios of the EO state and the closed states. For integrin  $\alpha 4\beta 1$ , the ratios were averaged to  $745 \pm 237$  from six  $\alpha 4\beta 1$  preparations, including  $\alpha 4\beta 1$  headpiece with high-mannose N-glycans,  $\alpha 4\beta 1$  ectodomain with high-mannose N-glycans,  $\alpha 4\beta 1$  ectodomain with complex N-glycans, and intact  $\alpha 4\beta 1$  on three different cell lines (Li & Springer, 2018); for integrin  $\alpha 5\beta 1$ , the intrinsic ligand-binding affinity ratio of the EO state and the closed states were averaged to  $3106 \pm 1689$  from eight soluble  $\alpha 5\beta 1$  preparations that varied in presence or absence of the lower legs, of a loose clasp in place of the TM domain, and in whether the N-linked glycan was complex, high mannose, or shaved (Li *et al.*, 2017). Using  $k_{on}^{EO}$  and  $k_{off}^{EO}$  rates experimentally measured in Figs. 2-4,  $k_{on}^{EC}$  and  $k_{off}^{EC}$  were derived from the  $k_{on}^{app(EC+EO)}$  and  $k_{off}^{app(EC+EO)}$  measured in extended ensembles, respectively (Fig. 7A, Eqs.1-2). By including the values for  $k_{on}^{EC}$  and  $k_{off}^{EC}$  in addition to  $k_{on}^{EO}$  and  $k_{off}^{EO}$ ,  $k_{on}^{BC}$  and  $k_{off}^{BC}$  were then derived from  $k_{on}^{app(BC+EC+EO)}$  and  $k_{off}^{app(BC+EC+EO)}$  measured in basal ensembles, respectively (Fig. 7A, Eqs. 3-4).

**Acknowledgements.** We thank Kelly L. Arnett in Center for Macromolecular Interactions of Harvard Medical school for training and consultation on BLI measurement. We thank Taekjip Ha for suggestions on our manuscript. This work was funded by NIH R01 HL131729 (“Activation trajectories of integrin  $\alpha 5\beta 1$ ”).

**Author Contributions.** J.L. and T.A.S. designed research and wrote the paper. J.L. carried out the measurements and analyzed the data. J.B.Y. prepared the Fabs and purified soluble integrins and ligands.

**Conflict of Interest Statement.** The authors declare no competing financial interests.

## References

- Akiyama SK, Yamada SS, Chen WT, Yamada KM (1989) Analysis of fibronectin receptor function with monoclonal antibodies: Roles in cell adhesion, migration, matrix assembly, and cytoskeletal organization. *J Cell Biol* 109: 863-875
- Alon R, Dustin ML (2007) Force as a Facilitator of Integrin Conformational Changes during Leukocyte Arrest on Blood Vessels and Antigen-Presenting Cells. *Immunity* 26: 17-27
- Alsallaq R, Zhou HX (2008) Electrostatic rate enhancement and transient complex of protein-protein association. *Proteins* 71: 320-335
- Astrof NS, Salas A, Shimaoka M, Chen JF, Springer TA (2006) Importance of force linkage in mechanochemistry of adhesion receptors. *Biochemistry* 45: 15020-15028
- Bazzoni G, Shih D-T, Buck CA, Hemler MA (1995) Monoclonal antibody 9EG7 defines a novel  $\beta 1$  integrin epitope induced by soluble ligand and manganese, but inhibited by calcium. *J Biol Chem* 270: 25570-25577
- Bouvard D, Pouwels J, De Franceschi N, Ivaska J (2013) Integrin inactivators: balancing cellular functions in vitro and in vivo. *Nat Rev Mol Cell Biol* 14: 430-442
- Chigaev A, Blenc AM, Braaten JV, Kumaraswamy N, Kepley CL, Andrews RP, Oliver JM, Edwards BS, Prossnitz ER, Larson RS *et al* (2001) Real-time analysis of the affinity regulation of  $\alpha 4$ -integrin: the physiologically activated receptor is intermediate in affinity between resting and  $Mn^{2+}$  or antibody activation. *J Biol Chem* 276: 48670-48678
- Clark K, Pankov R, Travis MA, Askari JA, Mould AP, Craig SE, Newham P, Yamada KM, Humphries MJ (2005) A specific  $\alpha 5\beta 1$ -integrin conformation promotes directional integrin translocation and fibronectin matrix formation. *J Cell Sci* 118: 291-300
- Dong X, Hudson NE, Lu C, Springer TA (2014) Structural determinants of integrin  $\beta$ -subunit specificity for latent TGF- $\beta$ . *Nat Struct Mol Biol* 21: 1091-1096
- Dong X, Zhao B, Iacob RE, Zhu J, Koksal AC, Lu C, Engen JR, Springer TA (2017) Force interacts with macromolecular structure in activation of TGF- $\beta$ . *Nature* 542: 55-59
- Dong X, Zhao B, Lin FY, Lu C, Rogers BN, Springer TA (2018) High integrin  $\alpha V\beta 6$  affinity reached by hybrid domain deletion slows ligand-binding on-rate. *Proc Natl Acad Sci U S A* 115: E1429-E1436
- Iwamoto DV, Calderwood DA (2015) Regulation of integrin-mediated adhesions. *Curr Opin Cell Biol* 36: 41-47
- Johnstone RW, Andrew SM, Hogarth MP, Pietersz GA, McKenzie IF (1990) The effect of temperature on the binding kinetics and equilibrium constants of monoclonal antibodies to cell surface antigens. *Mol Immunol* 27: 327-333
- Kim C, Ye F, Ginsberg MH (2011) Regulation of integrin activation. *Annu Rev Cell Dev Biol* 27: 321-345
- Kokkoli E, Ochsenhirt SE, Tirrell M (2004) Collective and single-molecule interactions of  $\alpha 5\beta 1$  integrins. *Langmuir* 20: 2397-2404

Legate KR, Fassler R (2009) Mechanisms that regulate adaptor binding to  $\beta$ -integrin cytoplasmic tails. *J Cell Sci* 122: 187-198

Li J, Springer TA (2017) Integrin extension enables ultrasensitive regulation by cytoskeletal force. *Proc Natl Acad Sci U S A* 114: 4685-4690

Li J, Springer TA (2018) Energy landscape differences among integrins establish the framework for understanding activation. *J Cell Biol* 217: 397-412

Li J, Su Y, Xia W, Qin Y, Humphries MJ, Vestweber D, Cabanas C, Lu C, Springer TA (2017) Conformational equilibria and intrinsic affinities define integrin activation. *EMBO J* 36: 629-645

Luo BH, Carman CV, Springer TA (2007) Structural basis of integrin regulation and signaling. *Annu Rev Immunol* 25: 619-647

Luque A, Gomez M, Puzon W, Takada Y, Sanchez-Madrid F, Cabanas C (1996) Activated conformations of very late activation integrins detected by a group of antibodies (HUTS) specific for a novel regulatory region (355-425) of the common  $\beta 1$  chain. *J Biol Chem* 271: 11067-11075

Mould AP, Askari JA, Byron A, Takada Y, Jowitt TA, Humphries MJ (2016) Ligand-induced Epitope Masking: Dissociation of integrin  $\alpha 5 \beta 1$ -fibronectin complexes only by monoclonal antibodies with an allosteric mode of action. *J Biol Chem* 291: 20993-21007

Mould AP, Craig SE, Byron SK, Humphries MJ, Jowitt TA (2014) Disruption of integrin-fibronectin complexes by allosteric but not ligand-mimetic inhibitors. *Biochem J* 464: 301-313

Mould AP, Garratt AN, Askari JA, Akiyama SK, Humphries MJ (1995) Identification of a novel anti-integrin monoclonal antibody that recognises a ligand-induced binding site epitope on the  $\beta 1$  subunit. *FEBS Lett* 363: 118-122

Mould AP, Travis MA, Barton SJ, Hamilton JA, Askari JA, Craig SE, Macdonald PR, Kammerer RA, Buckley PA, Humphries MJ (2005) Evidence that monoclonal antibodies directed against the integrin  $\beta$  subunit plexin/semaphorin/integrin domain stimulate function by inducing receptor extension. *J Biol Chem* 280: 4238-4246

Nagae M, Re S, Mihara E, Nogi T, Sugita Y, Takagi J (2012) Crystal structure of  $\alpha 5 \beta 1$  integrin ectodomain: Atomic details of the fibronectin receptor. *J Cell Biol* 197: 131-140

Nordenfelt P, Elliott HL, Springer TA (2016) Coordinated integrin activation by actin-dependent force during T-cell migration. *Nat Commun* 7: 13119

Nordenfelt P, Moore TI, Mehta SB, Kalappurakkal JM, Swaminathan V, Koga N, Lambert TJ, Baker D, Waters JC, Oldenbourg R *et al* (2017) Direction of actin flow dictates integrin LFA-1 orientation during leukocyte migration. *Nat Commun* 8: 2047

Park YK, Goda Y (2016) Integrins in synapse regulation. *Nat Rev Neurosci* 17: 745-756

Phan UT, Waldron TT, Springer TA (2006) Remodeling of the lectin/EGF-like interface in P- and L-selectin increases adhesiveness and shear resistance under hydrodynamic force. *Nat Immunol* 7: 883-889

Schürpf T, Springer TA (2011) Regulation of integrin affinity on cell surfaces. *EMBO J* 30: 4712-4727

Su Y, Xia W, Li J, Walz T, Humphries MJ, Vestweber D, Cabañas C, Lu C, Springer TA (2016) Relating conformation to function in integrin  $\alpha_5\beta_1$ . *Proc Natl Acad Sci U S A* 113: E3872-3881

Sun Z, Costell M, Fassler R (2019) Integrin activation by talin, kindlin and mechanical forces. *Nat Cell Biol* 21: 25-31

Sun Z, Guo SS, Fassler R (2016) Integrin-mediated mechanotransduction. *J Cell Biol* 215: 445-456

Swaminathan V, Kalappurakkal JM, Mehta SB, Nordenfelt P, Moore TI, Koga N, Baker DA, Oldenbourg R, Tani T, Mayor S *et al* (2017) Actin retrograde flow actively aligns and orients ligand-engaged integrins in focal adhesions. *Proc Natl Acad Sci U S A* 114: 10648-10653

Takagi J, Erickson HP, Springer TA (2001) C-terminal opening mimics "inside-out" activation of integrin  $\alpha_5\beta_1$ . *Nat Struct Biol* 8: 412-416

Takagi J, Strokovich K, Springer TA, Walz T (2003) Structure of integrin  $\alpha_5\beta_1$  in complex with fibronectin. *EMBO J* 22: 4607-4615

Wallner J, Lhota G, Jeschek D, Mader A, Vorauer-Uhl K (2013) Application of Bio-Layer Interferometry for the analysis of protein/liposome interactions. *J Pharm Biomed Anal* 72: 150-154

Wei H, Mo J, Tao L, Russell RJ, Tymiak AA, Chen G, Jacob RE, Engen JR (2014) Hydrogen/deuterium exchange mass spectrometry for probing higher order structure of protein therapeutics: methodology and applications. *Drug Discov Today* 19: 95-102

Xia W, Springer TA (2014) Metal ion and ligand binding of integrin  $\alpha_5\beta_1$ . *Proc Natl Acad Sci U S A* 111: 17863-17868

Xiao T, Takagi J, Wang J-H, Collier BS, Springer TA (2004) Structural basis for allostery in integrins and binding of fibrinogen-mimetic therapeutics. *Nature* 432: 59-67

Yakovenko OT, V.; Sokurenko, E.V.; Thomas, W.E.. (2015) Inactive conformation enhances binding function in physiological conditions. *Proc Natl Acad Sci USA* 112: 9884-9889

Yu Y, Schurpf T, Springer TA (2013) How natalizumab binds and antagonizes  $\alpha_4$  integrins. *J Biol Chem* 288: 32314-32325

Zhu J, Luo BH, Barth P, Schonbrun J, Baker D, Springer TA (2009) The structure of a receptor with two associating transmembrane domains on the cell surface: integrin  $\alpha_{IIb}\beta_3$ . *Mol Cell* 34: 234-249

Zhu J, Luo BH, Xiao T, Zhang C, Nishida N, Springer TA (2008) Structure of a complete integrin ectodomain in a physiologic resting state and activation and deactivation by applied forces. *Mol Cell* 32: 849-861

Zhu J, Zhu J, Springer TA (2013) Complete integrin headpiece opening in eight steps. *J Cell Biol* 201: 1053-1068

## Figure Legends

**Figure 1. Ligand-interaction kinetics of integrin ensembles. (A)** Three overall integrin conformational states (Luo *et al*, 2007). Individual domains are labeled next to the extended-open state. The structural motifs that move during opening ( $\alpha$ 1-helix,  $\alpha$ 7-helix and  $\beta$ 6- $\alpha$ 7 loop) are labeled in the  $\beta$ I domain of the EC and EO state. F represents tensile force exerted across ligand–integrin–adaptor complexes by the cytoskeleton and resisted by immobilized ligand. **(B)** Reaction scheme showing the apparent 1 vs. 1 kinetics of integrin and ligand binding (left), and the scheme required to correctly calculate ligand binding kinetics that takes into account the kinetics of conformational change (right). **(C)** Fabs utilized in this study, the integrin domains they bind, and their conformational specificity.

**Figure 2. Binding kinetics of ligands to intact  $\alpha$ 4 $\beta$ 1 on Jurkat cells. (A-E)** Binding and dissociation of FITC-LDVP (A-C) and Alexa488-VCAM D1D2 (D-E) to  $\alpha$ 4 $\beta$ 1 on Jurkat cells measured by flow cytometry. Cartoons in panel A, B, and C show the schemes for measuring ligand binding and dissociation in the association phase and dissociation phase in basal ensemble (A), extended ensembles (EC+EO states) stabilized with Fab 9EG7 (4  $\mu$ M) (B and D), and open ensemble (EO state) stabilized with Fabs 9EG7 (4  $\mu$ M) and HUTS4 (2  $\mu$ M) (C and E), respectively. Specific MFI with the MFI in EDTA (Fig. S1) subtracted is shown as open (association) or filled (dissociation) symbols; fits are shown as thin lines as indicated in keys. **(F)** Tabulation of results.  $K_{on}^{app}$  and  $k_{off}^{app}$  are from global fits of data at all ligand concentrations.  $\frac{K_{off}^{app}}{k_{on}^{app}}$  is also shown and compared to previous equilibrium  $K_d$  measurements (Li & Springer, 2018), except for Alexa488-VCAM D1D2 binding to extended states, which was measured here (Fig. S2). Errors for  $k_{on}^{app}$  and  $k_{off}^{app}$  values are s.e. from global nonlinear least square fitting; errors for  $\frac{K_{off}^{app}}{k_{on}^{app}}$  are propagated from errors of  $k_{on}^{app}$  and  $k_{off}^{app}$ ; errors for  $K_d$  values are s.d. from three independent experiments.

**Figure 3. Binding kinetics of Alexa488-Fn3<sub>9-10</sub> to  $\alpha$ 5 $\beta$ 1 on K562 cells. (A-B)** Binding of Alexa488-Fn3<sub>9-10</sub> to  $\alpha$ 5 $\beta$ 1 on K562 cells measured by flow cytometry. Measurements were on integrins in extended ensembles (EC+EO states) in presence of Fabs 9EG7 (6  $\mu$ M) and SNAKA51 (2  $\mu$ M) (A) or in the open (EO state) in presence of Fabs 9EG7 (6  $\mu$ M) and HUTS4 (2  $\mu$ M) (B), as illustrated in the cartoons. MFI with background in EDTA subtracted (Fig. S1) is shown as symbols and fits are shown as lines as explained in keys; the association phase has open symbols and solid lines, and the dissociation phase has filled symbols and dashed lines. **(C)** Tabulation of results.  $K_{on}^{app}$  and  $k_{off}^{app}$  are from global fits and errors are from non-linear least square fits.  $k_{off}^{app}/k_{on}^{app}$  is also shown with propagated error and compared to previous equilibrium  $K_d$  measurements (Li *et al.*, 2017).

**Figure 4. Binding kinetics of  $\alpha$ 5 $\beta$ 1 ectodomain to Fn3<sub>9-10</sub>. (A-D)** Binding of unclapsed high-mannose  $\alpha$ 5 $\beta$ 1 ectodomain measured with BLI. Schemes for measuring ligand binding and dissociation in the association phase and dissociation phase are shown in each panels' cartoon.  $\alpha$ 5 $\beta$ 1 ectodomain (analyte) at the indicated concentrations in nM was bound to biotin- Fn3<sub>9-10</sub> immobilized on streptavidin biosensors without Fab **(A)** or with 2  $\mu$ M Fab 8E3 **(B)**, or with 2  $\mu$ M 9EG7 and 5  $\mu$ M HUTS4 Fabs, **(C)** or with 1  $\mu$ M Fab 12G10 **(D)**. Arrows mark the start of the dissociation phase. Response curves are in gray and fitting curves in black. **(E)** The equilibrium binding (response) was calculated from  $k_{on}^{app}$  and  $k_{off}^{app}$  values at each  $\alpha$ 5 $\beta$ 1 ectodomain concentration and fit to a dose response curve to calculate  $K_d$  values. These values serve as a check on the  $k_{off}^{app}/k_{on}^{app}$  values in F. **(F)** Tabulation of  $K_d$  values from equilibrium response analysis in Panel E,  $k_{on}^{app}$  and  $k_{off}^{app}$  values from nonlinear least square fit of data in Panel A-D with 1 vs. 1 Langmuir binding model, and  $k_{off}^{app}/k_{on}^{app}$ . Errors without \* for  $k_{on}^{app}$ ,  $k_{off}^{app}$  and  $K_d$  are fitting errors from nonlinear least square fits; errors for  $k_{off}^{app}/k_{on}^{app}$  are propagated from errors of  $k_{on}^{app}$  and  $k_{off}^{app}$ . Errors with \* are difference from the mean of two independent measurements.

**Figure 5. Dissociation of FITC-LDVP from  $\alpha 4\beta 1$  on Jurkat cells in presence of closure-stabilizing Fab. (A-B)** FITC-LDVP dissociation from basal or extended ensembles of intact  $\alpha 4\beta 1$  on Jurkat cells measured using flow cytometry. FITC-LDVP (20nM) was incubated with Jurkat cells in absence (A) or in presence of extension-stabilizing Fab 9EG7 (4  $\mu$ M) (B) for 10 minutes to reach steady state. Then, 10  $\mu$ M unlabeled LDVP together with indicated concentrations of mAb13 Fab were added. Observed MFI ( $MFI_{obs}$ ) values as a function of time at indicated mAb13 Fab concentrations were globally fitted to  $MFI_{obs} = MFI_0 * e^{-k_{off}^{app} * t} + MFI_{background}$ , with  $MFI$  at the start of dissociation ( $MFI_0$ ) and background  $MFI$  ( $MFI_{background}$ ) as shared parameters and  $k_{off}^{app}$  as the individual fitting parameter at each mAb13 Fab concentration. **(C)** Dependence of  $k_{off}^{app}$  on mAb13 Fab concentration.  $k_{off}^{app}$  at each mAb13 Fab concentration in panels A and B were fitted to dose response curves to determine the maximum off-rate at saturating mAb13 Fab concentration,  $k_{off}^{max}$ , and the mAb13 Fab concentration when the off-rate reaches half of the maximum,  $EC_{50}^{mAb13}$ . All errors are from nonlinear least square fits.

**Figure 6. Dissociation of  $\alpha 5\beta 1$  ectodomain from biotin- Fn3<sub>9-10</sub> in presence of closure-stabilizing Fab. (A-B)** Unclasped high-mannose  $\alpha 5\beta 1$  ectodomain dissociation from biotin-Fn3<sub>9-10</sub> immobilized on streptavidin biosensors was monitored by BLI. Reaction schemes are illustrated in each panel's cartoons. Specifically, 50 nM  $\alpha 5\beta 1$  ectodomain was incubated with biotin-Fn3<sub>9-10</sub> biosensors for 10 minutes to reach steady state binding in absence (A) or presence of 2 $\mu$ M 9EG7 Fab (B). Biosensors were then transferred into wells lacking the  $\alpha 5\beta 1$  ectodomain in presence or absence of 9EG7 Fab as before and also containing the indicated concentrations of mAb13 Fab for measurement of dissociation. The observed response ( $R_{obs}$ ) at each mAb13 Fab concentration as a function of time was individually fitted to the single exponential,  $R_{obs} = R_0 * e^{-k_{off}^{app} * t}$ , for the initial response at the start of dissociation ( $R_0$ ) and the  $k_{off}^{app}$ . **(C)** Determination of  $k_{off}^{max}$  at saturating mAb13 Fab concentration.  $k_{off}^{app}$  was fit to mAb13 Fab concentration using a dose response curve for the maximum off-rate at saturating mAb13 Fab concentration to determine  $k_{off}^{max}$ . The mAb13 Fab concentration when the off-rate reaches half of the maximum,  $EC_{50}^{mAb13}$  was also determined. Errors are from nonlinear least square fits.

**Figure 7: Ligand-binding kinetics of each integrin state. (A)** Defined integrin  $\alpha 4\beta 1$  and  $\alpha 5\beta 1$  ensembles utilized in this study to measure ligand-interaction kinetics, as well as equations to relate the apparent on- and off- rates with the on- and off-rates for each conformational state. **(B)** Conformational state populations (%) in absence and presence of ligand at steady state. Previously reported populations for integrins in the absence of ligand and their affinities for ligand (Li & Springer, 2018; Li *et al.*, 2017) were used with Eqs.S5-S10 in Fig. S3B to calculate the populations in saturating ligand of ligand-bound integrin states in each type of ensemble studied here. **(C)** Values of  $k_{on}$  and  $k_{off}$  for conformational states of four integrin-ligand pairs. As discussed in the text and Methods, kinetic measurements on the EO state and the extended and basal ensembles were used with equations in panel A to calculate kinetics of the BC and EC states. The errors for directly measured values were fitting errors from non-linear least square fit; the errors for calculated BC and EC values were propagated. <sup>a</sup>: Intrinsic rates of EO state was from measurements in presence of HUTS4 & 9EG7 Fabs in Figs. 2-4, and intrinsic rates for BC and EC states were calculated with Eqs. 1-4 in panel A. <sup>b</sup>: From equilibrium measurements as specified in Fig.2 to Fig.4 legends. <sup>c</sup>: Calculated from the product of equilibrium  $K_d$  and  $k_{on}$ . **(D)** Comparison of Asp-binding pocket in the open state (PDB: 3ze2 chains C+D) and closed state (PDB: 3zdy chains C+D) of integrin  $\alpha 11\beta 3$  (Zhu *et al.*, 2013). The pocket in the  $\beta 3$   $\beta 1$  domain is shown with backbone and nearby sidechains in blue stick and blue dot surfaces and the MIDAS  $Mg^{2+}$  ion as a silver sphere. The ligand Asp sidechain and its backbone loop are shown in yellow, red sidechain carboxyl oxygens. The Asp sidechain C $\beta$  carbon and carboxyl oxygens are shown as yellow and red dot surfaces, respectively.



## A. Integrin conformational ensemble

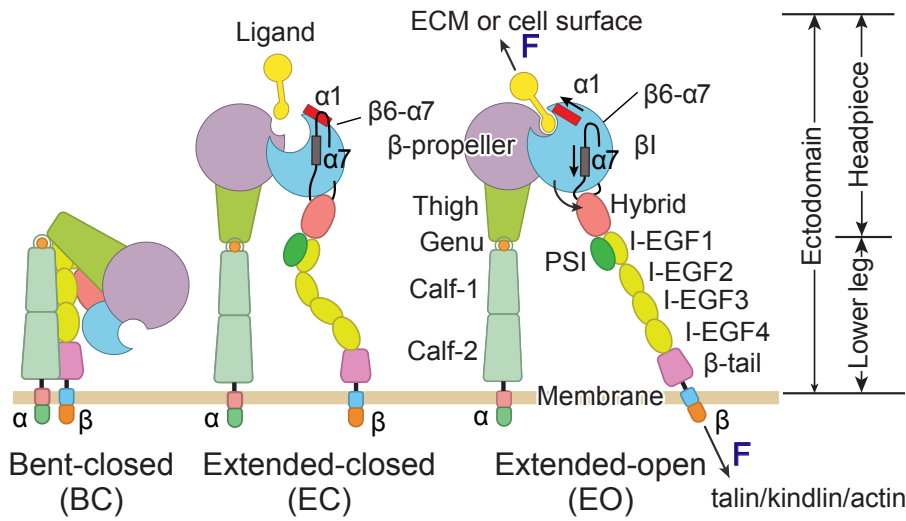

## B. Integrin ligand binding

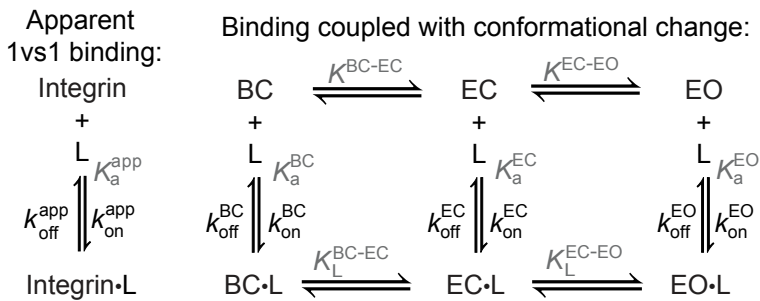

## C. Fabs against $\beta 1$ subunit or $\alpha 5$ subunit used in this study

| Name    | Domain        | Conformational specificity |
|---------|---------------|----------------------------|
| 8E3     | PSI           | BC + EC                    |
| 9EG7    | I-EGF2        | EC + EO                    |
| SNAKA51 | Calf-1/Calf-2 | EC + EO                    |
| HUTS4   | hybrid        | EO                         |
| 12G10   | $\beta 1$     | EO                         |
| mAb13   | $\beta 1$     | BC + EC                    |

**Figure 1. Integrin conformational ensemble and conformational specific Fabs used to stabilize a defined ensemble .**

**A** Basal

**B** Extended

**C** Open

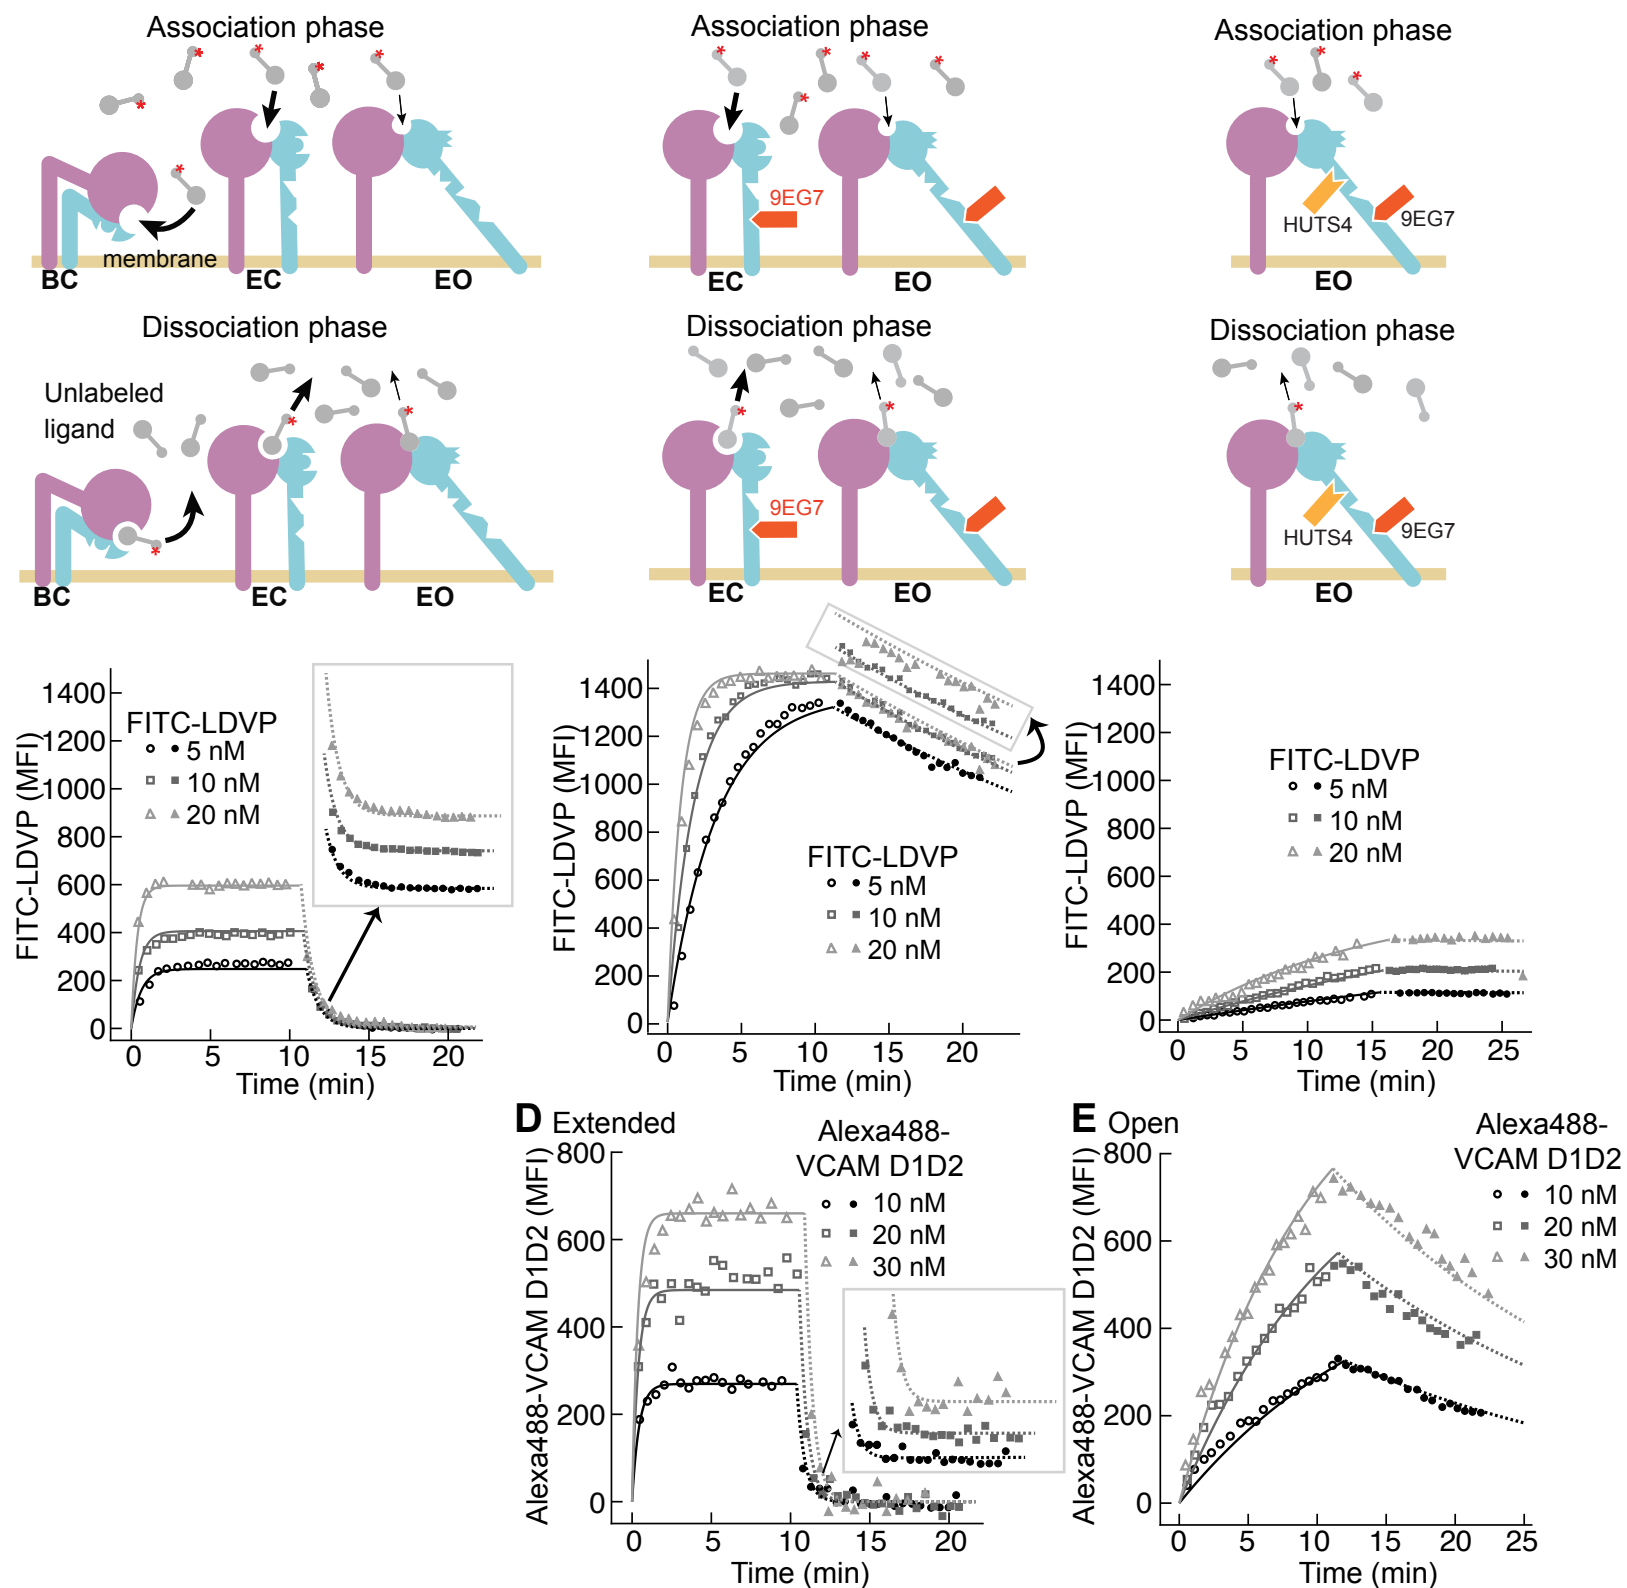

**F** FITC-LDVP and Alexa488-VCAM D1D2 binding to intact  $\alpha 4 \beta 1$  on Jurkat cells

| Condition | FITC-LDVP                                 |                                         |                                      |               | Alexa488-VCAM D1D2                        |                                         |                                      |               |
|-----------|-------------------------------------------|-----------------------------------------|--------------------------------------|---------------|-------------------------------------------|-----------------------------------------|--------------------------------------|---------------|
|           | $k_{on}^{app}$<br>( $10^4 M^{-1}s^{-1}$ ) | $k_{off}^{app}$<br>( $10^{-3} s^{-1}$ ) | $k_{off}^{app}/k_{on}^{app}$<br>(nM) | $K_d$<br>(nM) | $k_{on}^{app}$<br>( $10^4 M^{-1}s^{-1}$ ) | $k_{off}^{app}$<br>( $10^{-3} s^{-1}$ ) | $k_{off}^{app}/k_{on}^{app}$<br>(nM) | $K_d$<br>(nM) |
| Basal     | 120±10                                    | 19±3                                    | 15.8±2.8                             | 15.0±2.1      |                                           |                                         |                                      |               |
| Extended  | 87±8                                      | 0.36±0.11                               | 0.41±0.13                            | 0.25±0.05     | 43±6                                      | 34±2                                    | 79±13                                | 160±40        |
| Open      | 5.6±0.2                                   | 0.021±0.018                             | 0.38±0.34                            | 0.18±0.02     | 3.4±0.2                                   | 0.72±0.02                               | 21±1                                 | 30±4          |

**Figure 2. Binding kinetics of ligands to intact  $\alpha 4 \beta 1$  on Jurkat cells.**

## A Extended

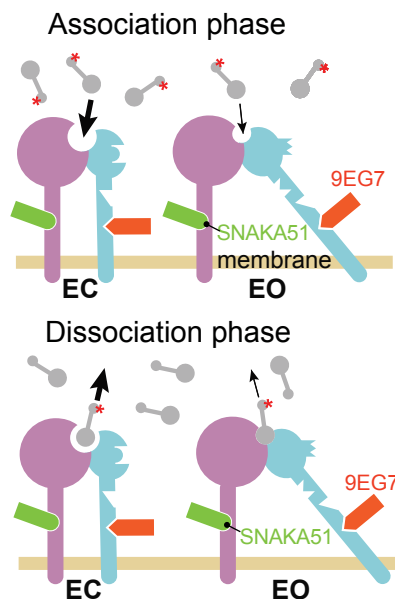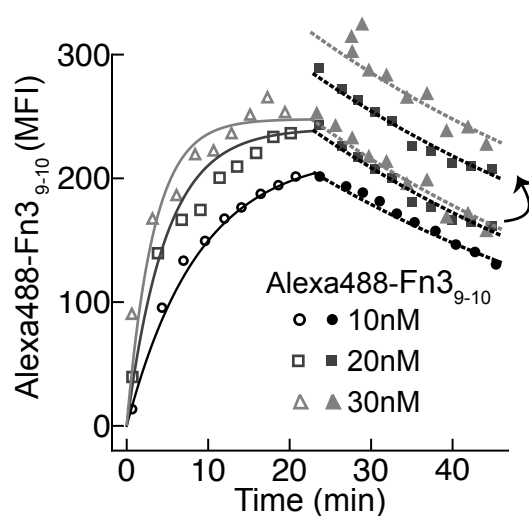

## B Open

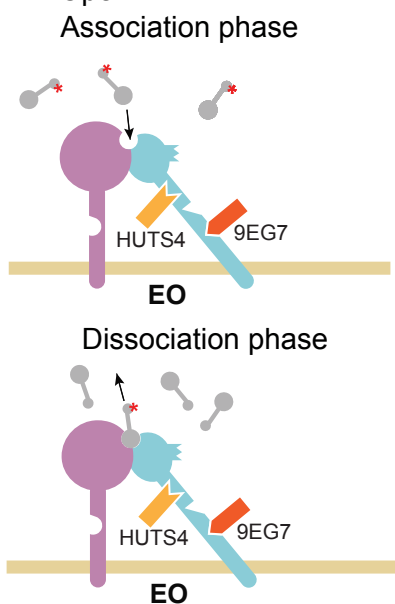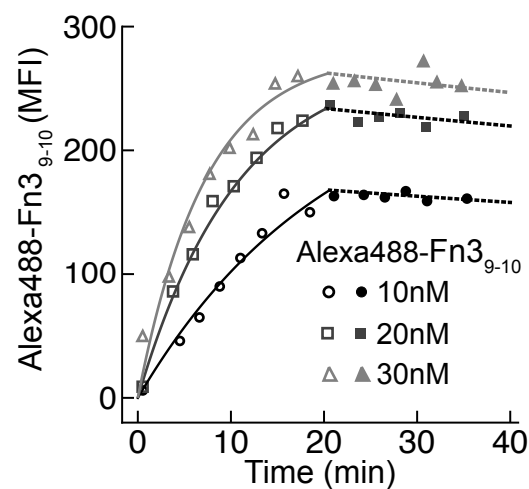

## C Alexa488-Fn3<sub>9-10</sub> binding to intact $\alpha 5\beta 1$ on K562 cells

| Condition | $k_{on}^{app}$<br>( $10^4 M^{-1} s^{-1}$ ) | $k_{off}^{app}$<br>( $10^{-3} s^{-1}$ ) | $k_{off}^{app}/k_{on}^{app}$<br>(nM) | $K_d$<br>(nM) |
|-----------|--------------------------------------------|-----------------------------------------|--------------------------------------|---------------|
| Extended  | $15.8 \pm 0.7$                             | $0.32 \pm 0.02$                         | $2.0 \pm 0.2$                        | $1.9 \pm 0.1$ |
| Open      | $7.5 \pm 0.3$                              | $0.052 \pm 0.021$                       | $0.7 \pm 0.3$                        | $1.3 \pm 0.1$ |

**Figure 3. Binding kinetics of Alexa488-Fn3<sub>9-10</sub> to  $\alpha 5\beta 1$  on K562 cells.**

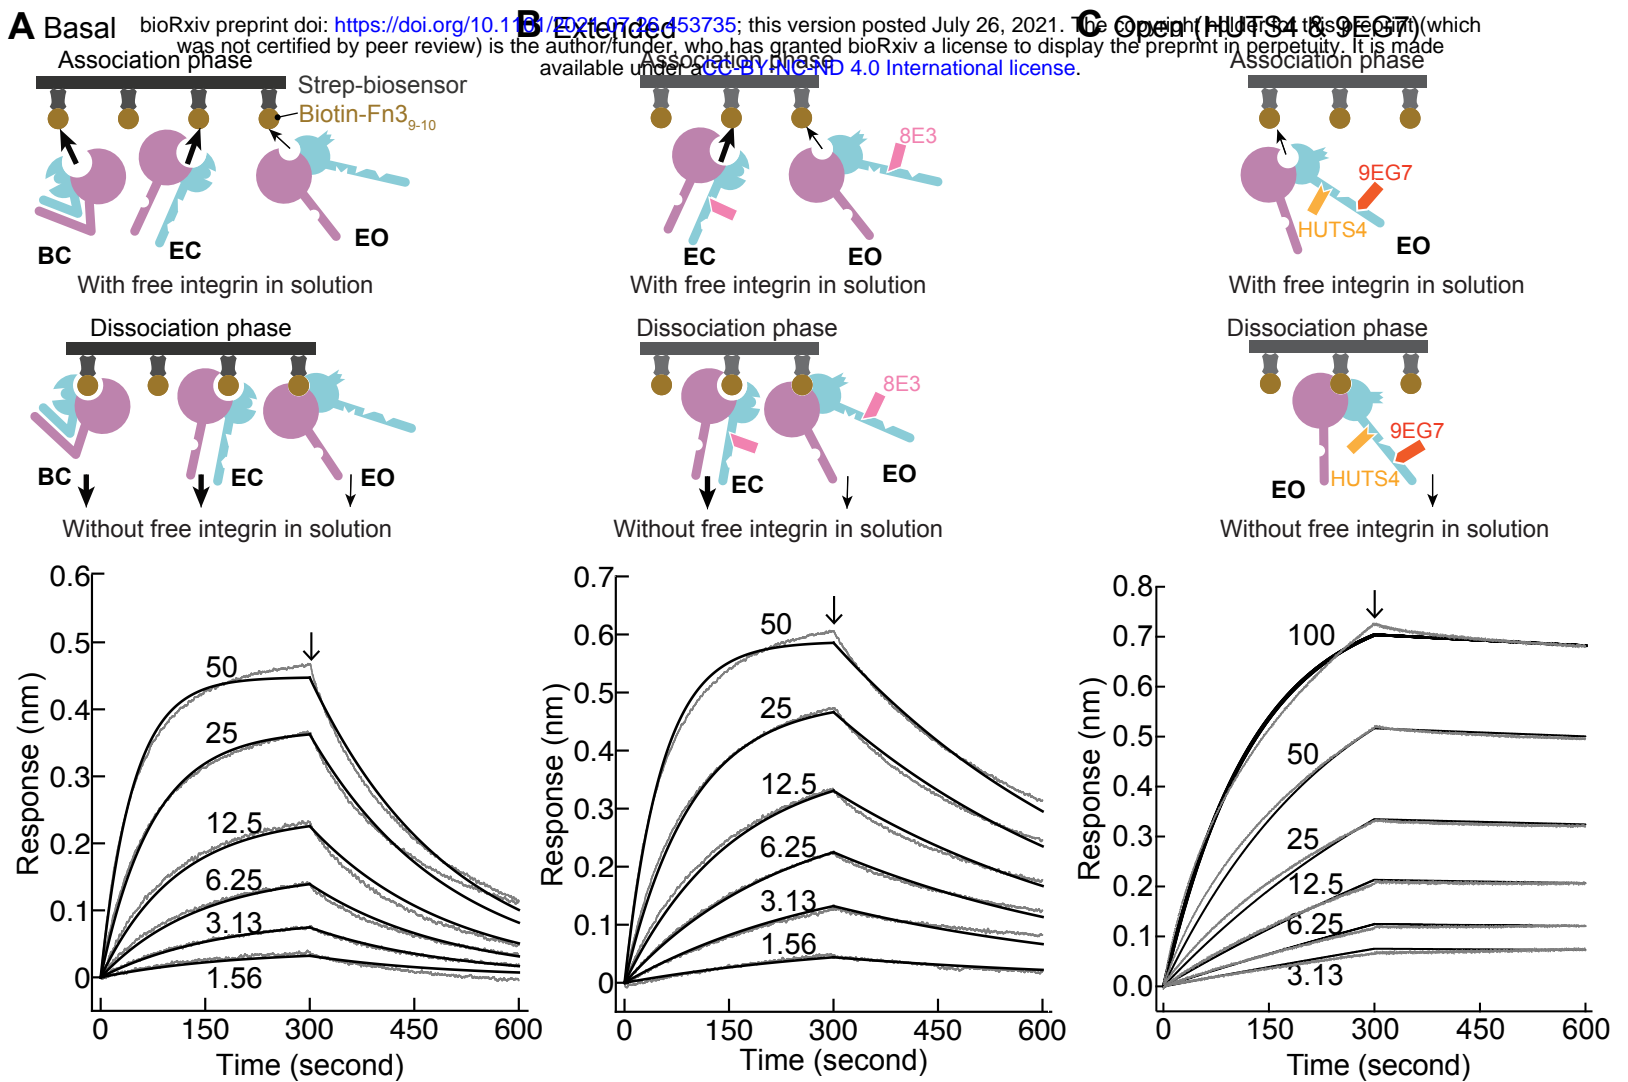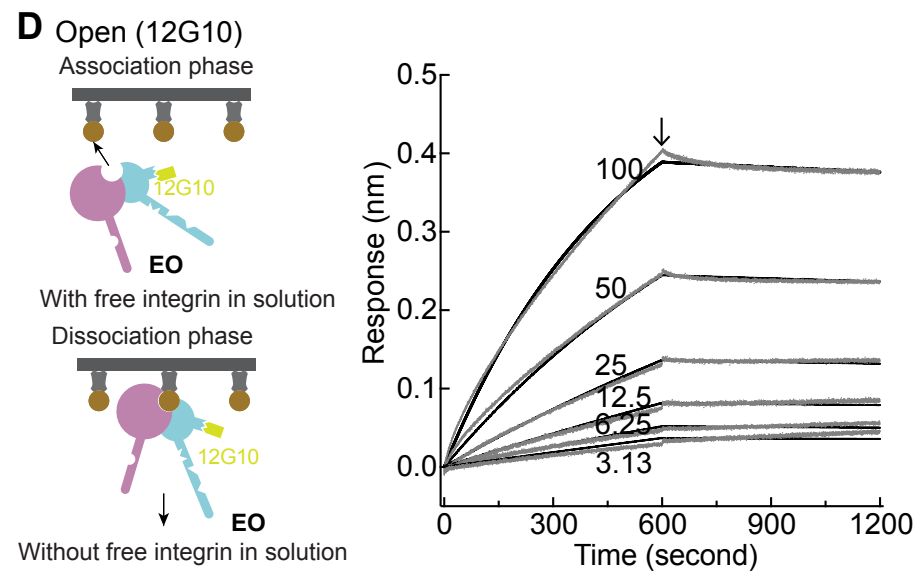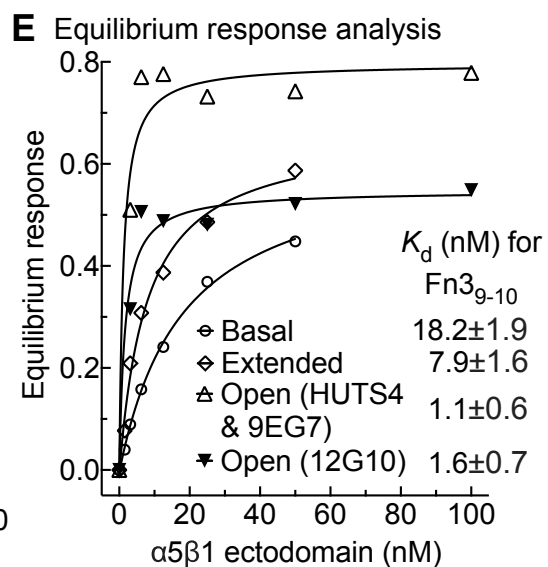

**F  $\alpha 5\beta 1$  ectodomain binding to biotin-Fn<sub>3-9-10</sub>**

|                     | $k_{on}^{app}$<br>( $10^4 M^{-1}s^{-1}$ ) | $k_{off}^{app}$<br>( $10^{-3} s^{-1}$ ) | $k_{off}^{app}/k_{on}^{app}$<br>(nM) | $K_d$<br>(nM)  |
|---------------------|-------------------------------------------|-----------------------------------------|--------------------------------------|----------------|
| Basal               | $33 \pm 1$                                | $5.0 \pm 0.1$                           | $14.9 \pm 0.1$                       | $18.2 \pm 1.9$ |
| Extended            | $33 \pm 1$                                | $2.3 \pm 0.1$                           | $7.0 \pm 0.1$                        | $7.9 \pm 1.6$  |
| Open (HUTS4 & 9EG7) | $7.9 \pm 0.2^*$                           | $0.093 \pm 0.013^*$                     | $1.2 \pm 0.2$                        | $1.1 \pm 0.6$  |
| Open (12G10)        | $1.95 \pm 0.05^*$                         | $0.047 \pm 0.008^*$                     | $2.4 \pm 0.1$                        | $1.6 \pm 0.7$  |

**Figure 4. Binding kinetics of  $\alpha 5\beta 1$  ectodomain to Fn<sub>3-9-10</sub>**

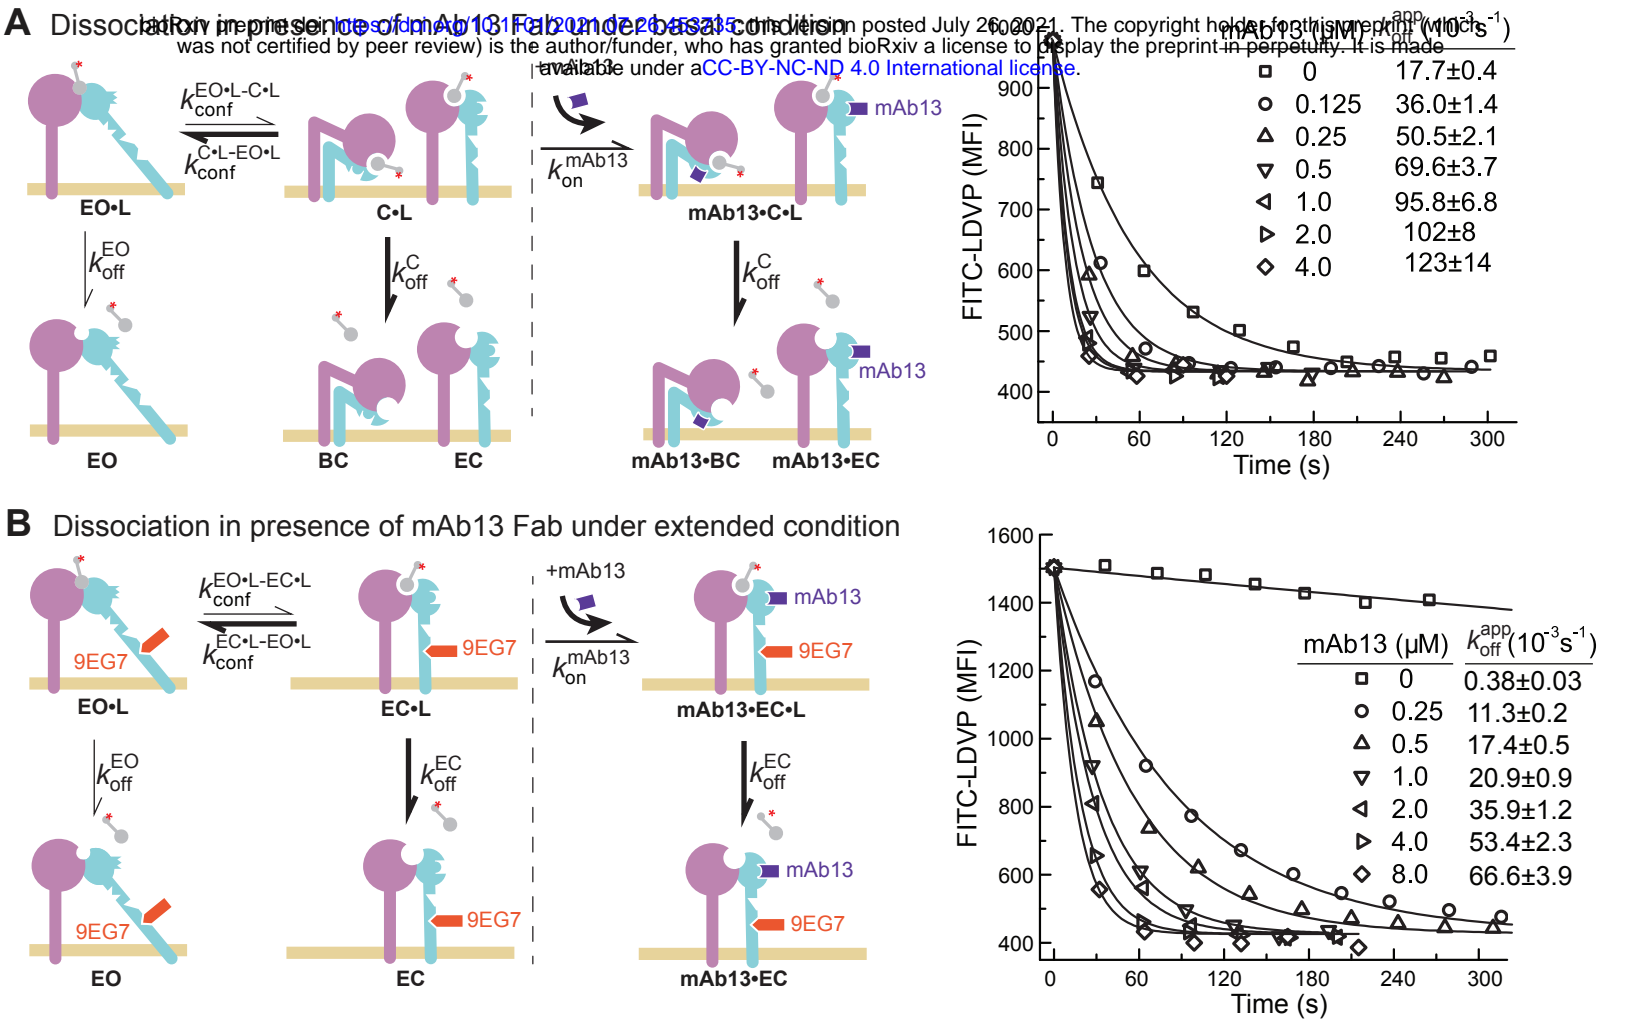

**Figure 5. Dissociation of FITC-LDVP from intact  $\alpha 4\beta 1$  in presence of closure-stabilizing Fab.**

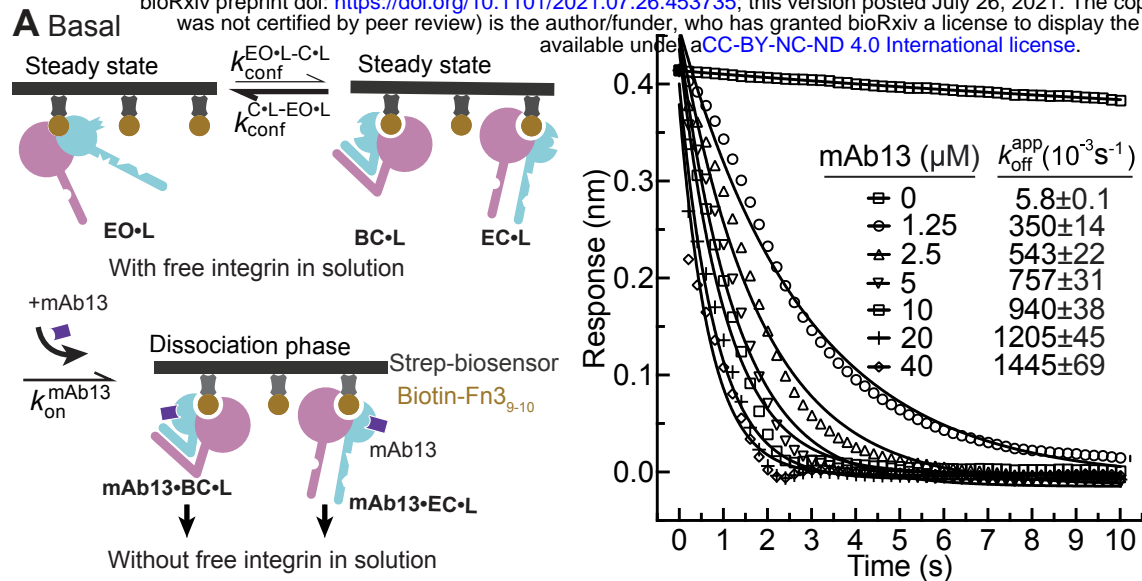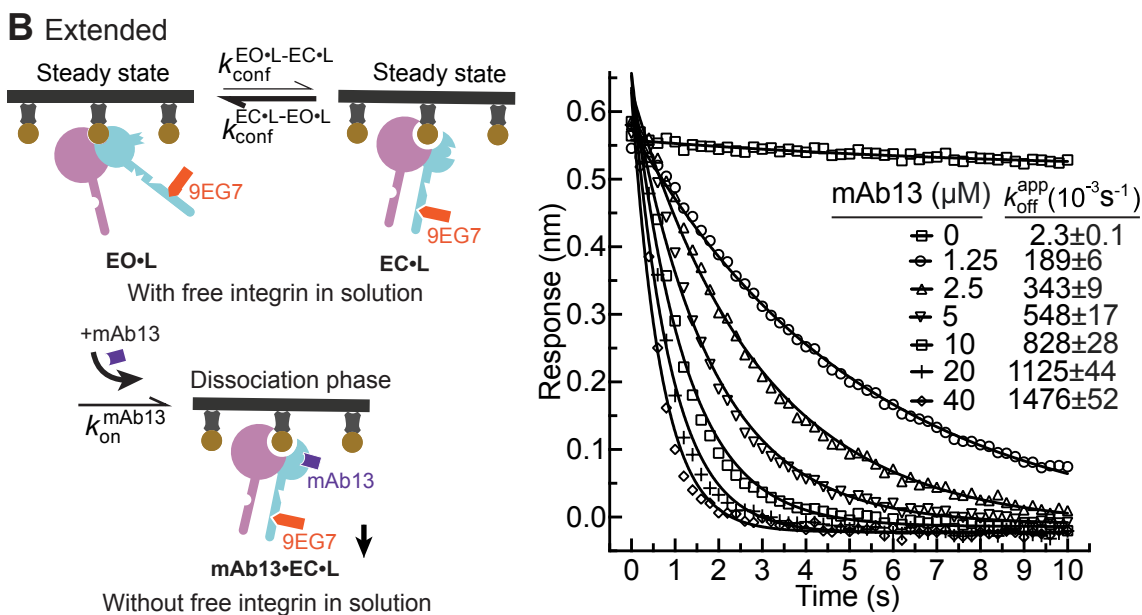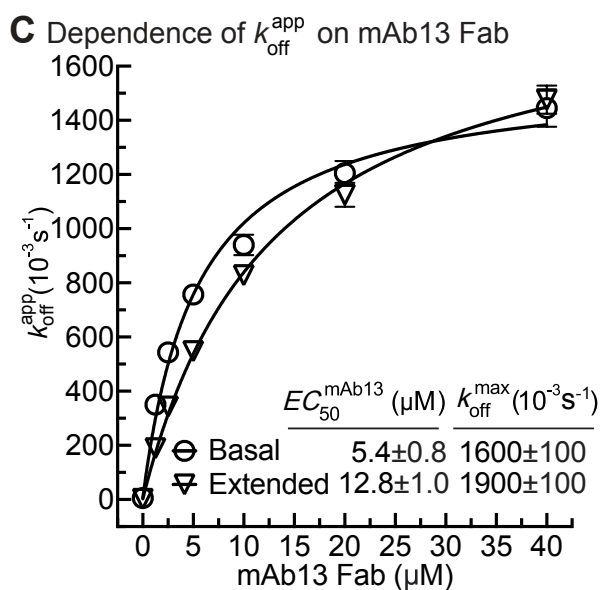

**Figure 6. Dissociation of  $\alpha 5\beta 1$  ectodomain from biotin-Fn3<sub>9-10</sub> in presence of closure-stabilizing Fab.**

| Condition | States present in the ensemble | $k_{on}^{app}$ and $k_{off}^{app}$ available under a                                                                                        |
|-----------|--------------------------------|---------------------------------------------------------------------------------------------------------------------------------------------|
| Open      | EO                             | $k_{on}^{EO}$                                                                                                                               |
|           | EO·L                           | $k_{off}^{EO}$                                                                                                                              |
| Extended  | EC, EO                         | $k_{on}^{app(EC+EO)} \approx \frac{P^{EC}}{P^{EC} + P^{EO}} k_{on}^{EC} + \frac{P^{EO}}{P^{EC} + P^{EO}} k_{on}^{EO}$ (Eq.1)                |
|           | EC·L, EO·L                     | $k_{off}^{app(EC+EO)} \approx \frac{P^{EC·L}}{P^{EC·L} + P^{EO·L}} k_{off}^{EC} + \frac{P^{EO·L}}{P^{EC·L} + P^{EO·L}} k_{off}^{EO}$ (Eq.2) |
| Basal     | BC, EC, EO                     | $k_{on}^{app(BC+EC+EO)} \approx P^{BC} k_{on}^{BC} + P^{EC} k_{on}^{EC} + P^{EO} k_{on}^{EO}$ (Eq.3)                                        |
|           | BC·L, EC·L, EO·L               | $k_{off}^{app(BC+EC+EO)} \approx P^{BC·L} k_{off}^{BC} + P^{EC·L} k_{off}^{EC} + P^{EO·L} k_{off}^{EO}$ (Eq.4)                              |

**B Conformational state populations (%) in absence and presence of ligand at steady state for each characterized integrin preparation**

| Ligand bound | Ensemble | intact $\alpha4\beta1$ -Jurkat |      |       | intact $\alpha5\beta1$ -K562 |      |       | $\alpha5\beta1$ -ectodomain |      |      |
|--------------|----------|--------------------------------|------|-------|------------------------------|------|-------|-----------------------------|------|------|
|              |          | BC                             | EC   | EO    | BC                           | EC   | EO    | BC                          | EC   | EO   |
| -            | Basal    | 98.5                           | 0.4  | 1.1   | 99.84                        | 0.05 | 0.11  | 64.3                        | 31.1 | 4.6  |
| -            | Extended | 0                              | 28   | 72    | 0                            | 30   | 70    | 0                           | 87.1 | 12.9 |
| -            | Open     | 0                              | 0    | 100   | 0                            | 0    | 100   | 0                           | 0    | 100  |
| +            | Basal    | 10.9                           | 0.04 | 89.0  | 22.6                         | 0.01 | 77.4  | 0.5                         | 0.2  | 99.3 |
| +            | Extended | 0                              | 0.05 | 99.95 | 0                            | 0.01 | 99.99 | 0                           | 0.2  | 99.8 |
| +            | Open     | 0                              | 0    | 100   | 0                            | 0    | 100   | 0                           | 0    | 100  |

**C Intrinsic on- and off- rates of each integrin state for ligand**

|                                                |                                                            | BC        | EC          | EO          |
|------------------------------------------------|------------------------------------------------------------|-----------|-------------|-------------|
| Intact $\alpha4\beta1$ for LDVP                | $k_{on}$ ( $10^4 M^{-1} s^{-1}$ ) <sup>a</sup>             | 120±20    | 300±170     | 5.6±0.2     |
|                                                | $k_{off}$ ( $10^{-3} s^{-1}$ ) <sup>a</sup>                | 170±60    | 640±590     | 0.021±0.018 |
|                                                | $K_d$ (nM) <sup>b</sup>                                    | 130±40    | 130±40      | 0.18±0.02   |
|                                                | $k_{off} = K_d * k_{on}$ ( $10^{-3} s^{-1}$ ) <sup>c</sup> | 160±60    | 390±250     | 0.010±0.001 |
| Intact $\alpha4\beta1$ for VCAM D1D2           | $k_{on}$ ( $10^4 M^{-1} s^{-1}$ ) <sup>a</sup>             |           | 150±90      | 3.4±0.2     |
|                                                | $k_{off}$ ( $10^{-3} s^{-1}$ ) <sup>a</sup>                |           | 57000±23000 | 0.72±0.02   |
|                                                | $K_d$ (nM) <sup>b</sup>                                    |           | 22000±7000  | 30±4        |
|                                                | $k_{off} = K_d * k_{on}$ ( $10^{-3} s^{-1}$ ) <sup>c</sup> |           | 33000±22000 | 1.0±0.1     |
| Intact $\alpha5\beta1$ for Fn3 <sub>9-10</sub> | $k_{on}$ ( $10^4 M^{-1} s^{-1}$ ) <sup>a</sup>             |           | 35±6        | 7.5±0.3     |
|                                                | $k_{off}$ ( $10^{-3} s^{-1}$ ) <sup>a</sup>                |           | 1900±1200   | 0.052±0.021 |
|                                                | $K_d$ (nM) <sup>b</sup>                                    |           | 4000±2100   | 1.3±0.1     |
|                                                | $k_{off} = K_d * k_{on}$ ( $10^{-3} s^{-1}$ ) <sup>c</sup> |           | 1400±800    | 0.098±0.001 |
| $\alpha5\beta1$ ecto for Fn3 <sub>9-10</sub>   | $k_{on}$ ( $10^4 M^{-1} s^{-1}$ ) <sup>a</sup>             | 34±2      | 37±2        | 7.9±0.2     |
|                                                | $k_{off}$ ( $10^{-3} s^{-1}$ ) <sup>a</sup>                | 740±400   | 1000±600    | 0.093±0.013 |
|                                                | $K_d$ (nM) <sup>b</sup>                                    | 3400±2600 | 3400±2600   | 1.1±0.6     |
|                                                | $k_{off} = K_d * k_{on}$ ( $10^{-3} s^{-1}$ ) <sup>c</sup> | 1200±900  | 1300±1000   | 0.085±0.046 |

**D Asp-binding pocket in integrin  $\alpha IIB\beta3$**

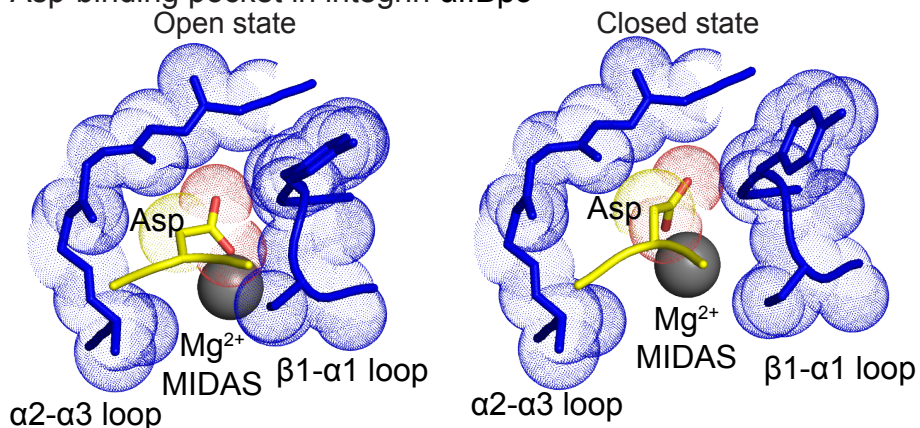

**Figure 7. Ligand-binding kinetics of each integrin state.**
